1 **Carm1 regulates the speed of C/EBP $\alpha$ -induced transdifferentiation by a cofactor stealing**  
2 **mechanism**

3

4 Guillem Torcal Garcia<sup>1,2\*</sup>, Elisabeth Kowenz-Leutz<sup>3\*</sup>, Tian V. Tian<sup>1,2,4\*</sup>, Antonios Klonizakis<sup>1,2</sup>,  
5 Jonathan Lerner<sup>5</sup>, Luisa de Andrés-Aguayo<sup>1,2</sup>, Clara Berenguer<sup>1,2</sup>, Marcos Plana-Carmona<sup>1,2</sup>,  
6 Maria Vila-Casadesús<sup>1,2,4</sup>, Romain Bulteau<sup>6</sup>, Mirko Francesconi<sup>6</sup>, Sandra Peiró<sup>4</sup>, Kenneth S.  
7 Zaret<sup>5</sup>, Achim Leutz<sup>3,7#</sup>, Thomas Graf<sup>1,2#</sup>

8 <sup>1</sup>Gene Regulation, Stem Cells and Cancer Program, Centre for Genomic Regulation (CRG), The  
9 Barcelona Institute of Science and Technology (BIST), Carrer del Doctor Aiguader 88, 08003  
10 Barcelona, Spain

11 <sup>2</sup>Universitat Pompeu Fabra (UPF), Carrer del Doctor Aiguader 88, 08003 Barcelona, Spain.

12 <sup>3</sup>Max Delbrück Center for Molecular medicine in the Helmholtz Association, Robert-Rössle-  
13 Strasse 10, 13125 Berlin, Germany.

14 <sup>4</sup>Vall d'Hebron Institute of Oncology (VHIO), Carrer de Natzaret 115-117, 08035 Barcelona,  
15 Spain.

16 <sup>5</sup>Institute for Regenerative Medicine and Department of Cell and Developmental Biology,  
17 Perelman School of Medicine, University of Pennsylvania, 3400 Civic Center Blvd, PA 19104  
18 Philadelphia, USA.

19 <sup>6</sup>Laboratoire de Biologie et Modélisation de la Cellule, Université de Lyon, ENS, UCBL, CNRS,  
20 INSERM, UMR5239, U 1210, F-69364 Lyon, France.

21 <sup>7</sup>Institute of Biology, Humboldt University of Berlin, Invalidenstrasse 42, 10115 Berlin, Germany.

22 \*,#Equal contributions

23 Correspondence: [thomas.graf@crg.eu](mailto:thomas.graf@crg.eu); [aleutz@mdc-berlin.de](mailto:aleutz@mdc-berlin.de)

24 **ABSTRACT**

25 Cell fate decisions are driven by lineage-restricted transcription factors but how they are  
26 regulated is incompletely understood. The C/EBP $\alpha$ -induced B cell to macrophage  
27 transdifferentiation (BMT) is a powerful system to address this question. Here we describe that  
28 C/EBP $\alpha$  with a single arginine mutation (C/EBP $\alpha$ <sup>R35A</sup>) induces a dramatically accelerated BMT  
29 in mouse and human cells. Changes in the expression of lineage-restricted genes occur as early  
30 as within 1 hour compared to 18 hours with the wild type. Mechanistically C/EBP $\alpha$ <sup>R35A</sup> exhibits  
31 an increased affinity for PU.1, a bi-lineage transcription factor required for C/EBP $\alpha$ -induced BMT.  
32 The complex induces more rapid chromatin accessibility changes and an enhanced relocation  
33 ('stealing') of PU.1 from B cell to myeloid gene regulatory elements. Arginine 35 is methylated  
34 by CARM1 and inhibition of the enzyme accelerates BMT, as seen with the mutant. Our data  
35 suggest that the relative proportions of methylated and unmethylated C/EBP $\alpha$  in bipotent  
36 progenitors determine the velocity of cell fate choice and also affect lineage directionality. This  
37 could represent a more general mechanism that coordinates the speed and faithfulness of cell  
38 fate conversions.

39

## 40 INTRODUCTION

41 The hematopoietic system is a model of choice to understand how cells diversify into different  
42 lineages (Notta et al., 2016; Orkin and Zon, 2008). Combinations of synergistic and antagonistic  
43 transcription factors (TFs) are the main drivers of cell fate decisions, activating new gene  
44 expression programs while silencing the old ones. Their balance is an important determinant,  
45 with the most highly expressed factors becoming dominant (Graf and Enver, 2009a; Okawa et  
46 al., 2018; Orkin and Zon, 2008). However, whether there are other determinants that modulate  
47 the factors' activity and thus the velocity by which a precursor chooses alternative fates remains  
48 poorly understood.

49 A powerful approach to study the mechanism of cell fate decisions is TF-induced lineage  
50 conversions (Graf and Enver, 2009b). C/EBP $\alpha$  induces the efficient transdifferentiation of B and  
51 T lineage cells into monocyte/macrophages (henceforth referred as macrophages) (Laiosa et al.,  
52 2006; Xie et al., 2004a). This conversion requires the transcription factor PU.1, a key component  
53 of the regulatory networks that define lymphoid and myeloid cells (Arinobu et al., 2007; Leddin et  
54 al., 2011; Singh et al., 1999). C/EBP $\alpha$  contains a C-terminal basic region leucine zipper DNA-  
55 binding domain (bZip) as well as an N-terminal transactivation domain divided into distinct  
56 transactivating elements (TE-I, II and III) (Ramberger et al., 2021). During hematopoiesis it is  
57 most highly expressed in granulocyte-macrophage progenitors (GMPs) (Ohlsson et al., 2016)  
58 and its ablation blocks the formation of GMPs and granulocytes while reducing the number of  
59 monocytes (Heath et al., 2004; Ma et al., 2014; Zhang et al., 2004).

60 Protein post-translational modifications can alter protein structure, subcellular localization and  
61 interactome and may dynamically coordinate signaling networks (Deribe et al., 2010; Torcal  
62 Garcia and Graf, 2021a). Arginine methylation is a common protein modification effected by  
63 protein arginine methyltransferases (Prmts), which can catalyze asymmetrical and symmetrical  
64 arginine dimethylation, as well as monomethylation (Wu et al., 2021). While most studies on the  
65 role of arginine methylation have focused on histones it may also affect the function of proteins  
66 involved in DNA replication (Guo et al., 2010) and differentiation (Kawabe et al., 2012; Kowenz-  
67 Leutz et al., 2010). Among the Prmts, Carm1 (Prmt4) is particularly relevant for developmental  
68 decisions such as during early embryo development, adipogenesis and muscle regeneration, as

69 well as for cancer (Kawabe et al., 2012; Kim et al., 2010; Li et al., 2013; M. E. Torres-Padilla et  
70 al., 2007; Yadav et al., 2008).

71 Here we describe that the methylation of a specific arginine within the transcription  
72 activation domain of C/EBP $\alpha$  by the arginine methyltransferase Carm1 dampens the speed by  
73 which the factor induces transdifferentiation. Mechanistically, the unmethylated form of C/EBP $\alpha$   
74 accelerates BMT induction by the enhanced relocation ('stealing') of its partner PU.1 from B cell  
75 gene regulatory regions to myeloid regions, accompanied by an accelerated closing and opening  
76 of chromatin. Our data suggest that the two forms of C/EBP $\alpha$  bias the differentiation of bipotent  
77 progenitors towards alternative lineages.

78

## 79 RESULTS

### 80 Mutation of arginine 35 of C/EBP $\alpha$ accelerates immune cell transdifferentiation

81 To identify post-translational modifications that are associated with the BMT-inducing ability of  
82 C/EBP $\alpha$  (**Figure 1A**), we focused on arginines in the factor's transactivation domain. We  
83 identified three evolutionarily conserved arginines (R12, R35, and R86) located within the N-  
84 terminus (**Figure 1B**) in two transactivating elements (TE-I and TE-II) required for efficient BM  
85 (Stoilova et al., 2013). First we generated a triple mutant (C/EBP $\alpha$ <sup>TM</sup>) in which these arginines  
86 were substituted by alanines (Figure 1B) and inserted it into a  $\beta$ -estradiol ( $\beta$ -est)-inducible  
87 retroviral vector (Xie et al., 2004b), generating C/EBP $\alpha$ <sup>TM</sup>-ER-GFP. This construct was used to  
88 infect bone marrow-derived B cell precursors (henceforth called B cells) grown on feeder cells  
89 for 2 days and GFP+ B cells isolated. The infected cells were re-seeded on feeders, cultures  
90 treated with  $\beta$ -est and expression of the macrophage marker Mac-1 (CD11b) and the B cell  
91 marker CD19 (Springer et al., 1979; Wang et al., 2012) monitored by FACS at various days later.  
92 Surprisingly, C/EBP $\alpha$ <sup>TM</sup> greatly accelerated BMT, generating almost 100% macrophage-like cells  
93 (Mac-1+, CD19-) within 3 days compared to 4 to 5 days for C/EBP $\alpha$ WT-infected cells (**Figure,**  
94 **1C, S1A**).

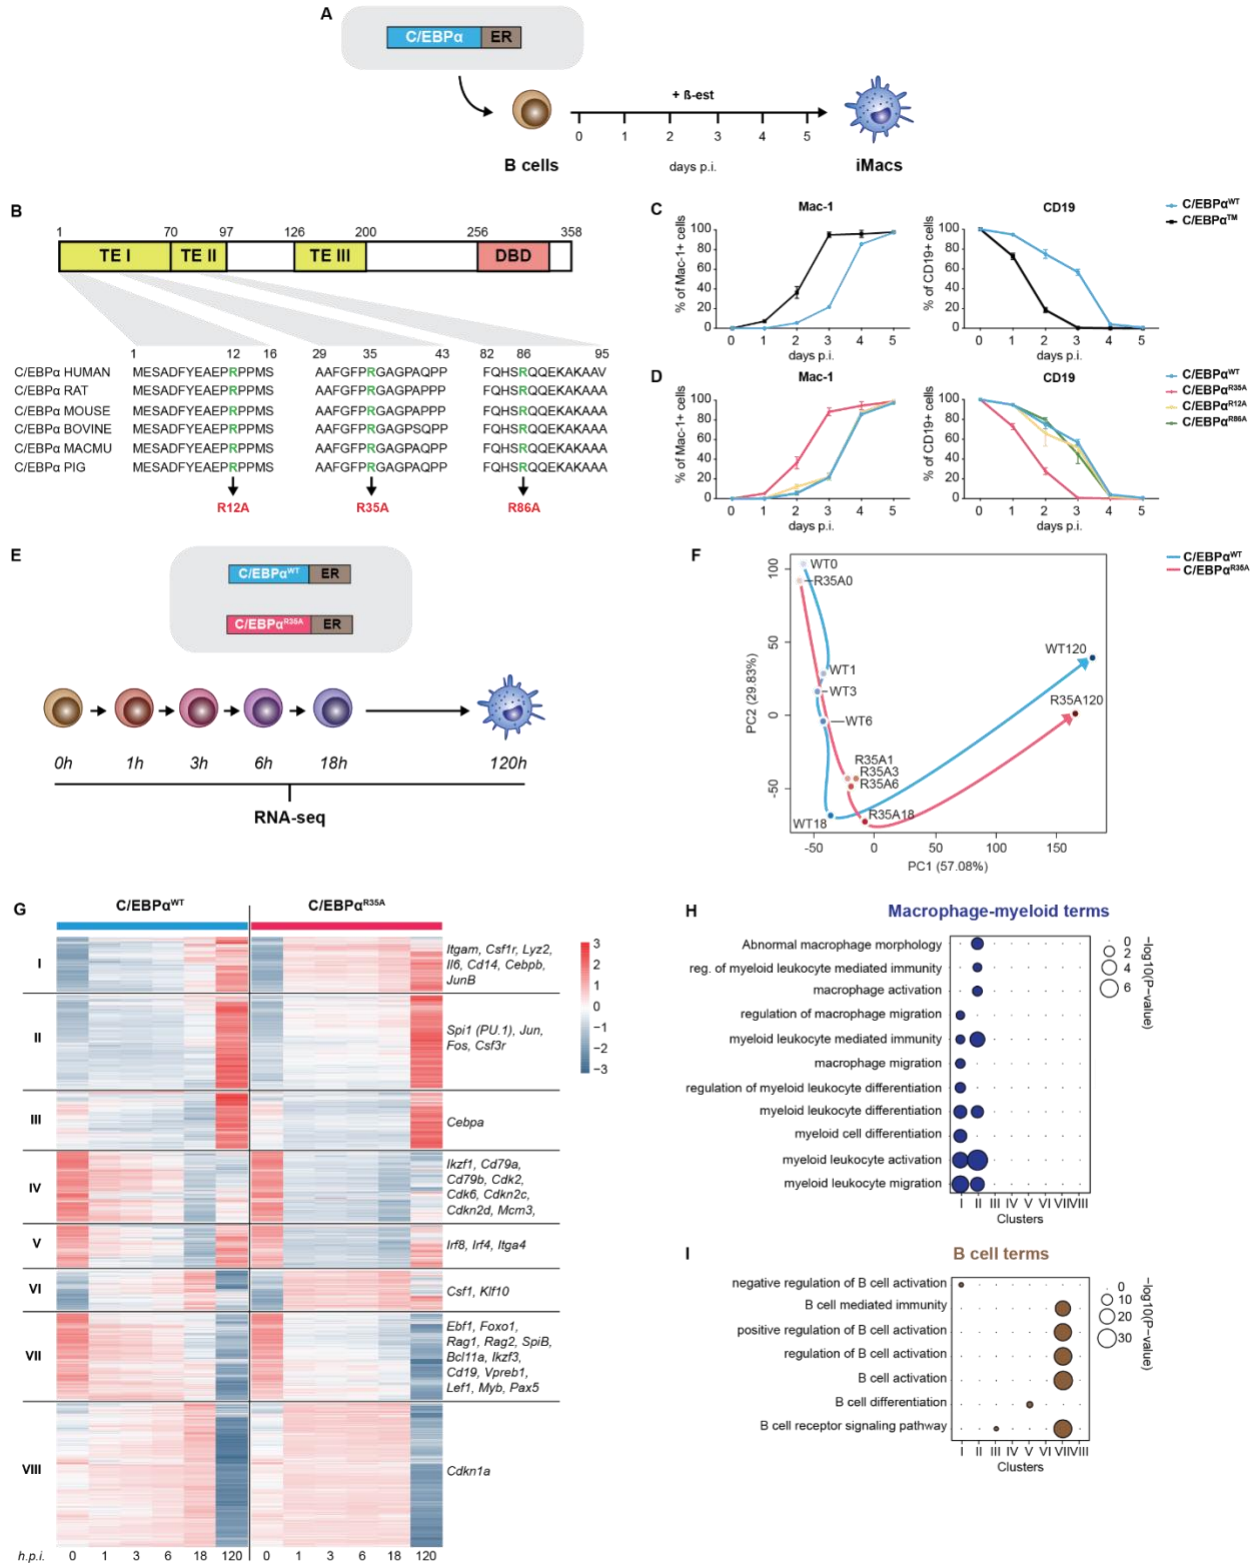

95 **Figure 1. Mutation of arginine 35 in C/EBPα accelerates B cell to macrophage transdifferentiation. A.**  
 96 Schematics of the B cell to macrophage transdifferentiation (BMT) method. Bone marrow-derived pre-B cells  
 97 infected with C/EBPα-ER retrovirus are treated with β-est to induce the factor's translocation into the nucleus,

98 inducing a BMT within 4 to 5 days. **B.** C/EBP $\alpha$  structure (TE = transactivation element; DBD = DNA-binding domain)  
99 and location of conserved arginines R12, R35, and R86 within the N-terminus, which were replaced by alanines. **C.**  
100 Kinetics of BMT induced by wild type (WT) C/EBP $\alpha$  and a triple mutant (C/EBP $\alpha^{\text{TM}}$ ) with alanine replacements of  
101 R12, R35 and R86. BMT was assessed by Mac-1 and CD19 expression (mean  $\pm$  s.d., n=3). **D.** Kinetics of BMT  
102 induced by C/EBP $\alpha^{\text{WT}}$  and single arginine to alanine replacements at C/EBP $\alpha$  R12, R35, and R86. **E.** Schematics  
103 of experimental approach for RNA-sequencing (RNA-seq) of B cells infected with either C/EBP $\alpha^{\text{WT}}$ - or C/EBP $\alpha^{\text{R35A}}$ -  
104 ER retroviral constructs induced for various timepoints. **F.** Principal component analysis (PCA) of 11,780  
105 differentially expressed genes (DEGs) during BMT (n=2). Arrows connecting individual time points visualize  
106 trajectories **G.** Hierarchical clustering of DEGs with representative genes shown next to each cluster. **H-I.** Gene  
107 ontology (GO) enrichment analysis of macrophage-myeloid (**H**) and B cell (**I**) terms of the clusters from Figure 1G.  
108 Diameter of circles is proportional to the p-value. See also **Figure S1**.

109 Next, we tested the effect of alanine replacement for each of the 3 individual arginines (R12A,  
110 R35A, and R86A) and found that C/EBP $\alpha^{\text{R35A}}$  recapitulated the phenotype of C/EBP $\alpha^{\text{TM}}$ , while  
111 C/EBP $\alpha^{\text{R12A}}$  and C/EBP $\alpha^{\text{R86A}}$  showed no such effect (**Figures 1D, S1A**). Five-day-induced  
112 C/EBP $\alpha^{\text{R35A}}$  cells resembled normal macrophages similar to those seen with C/EBP $\alpha^{\text{WT}}$  cells,  
113 consisting of large, mostly adherent cells, with extensive f-actin filaments and eccentric nuclei.  
114 In addition, the cells were highly phagocytic, as >90% of them ingested carboxylated beads  
115 (**Figures S1B, C**).

116 These data show that the replacement of arginine 35 with alanine in C/EBP $\alpha$  dramatically  
117 accelerates the factor's capacity to induce a BMT, as evidenced by a higher velocity of silencing  
118 and activation of B cell and macrophage markers, respectively. Moreover, the induced cells  
119 resembled normal macrophages and were functional.

## 120 **C/EBP $\alpha^{\text{R35A}}$ hastens gene expression changes of lineage-associated genes at early time** 121 **points**

122 To study the effects of C/EBP $\alpha^{\text{R35A}}$  on gene expression, we performed RNA-sequencing  
123 (RNA-seq) of infected B cells induced for 0, 1, 3, 6, 18, and 120 hours (**Figure 1E**). Principal  
124 component analysis (PCA) showed a pronounced acceleration in the trajectory of differentially  
125 expressed genes throughout BMT (11,780 genes) compared to the WT virus. Strikingly, induction  
126 of C/EBP $\alpha^{\text{R35A}}$  cells for just 1 hour caused changes similar to 18 hours induced C/EBP $\alpha^{\text{WT}}$  cells,  
127 with their trajectories converging again at 120 hours post induction (hpi; **Figure 1F**). The vast  
128 majority of genes affected by the wild type and the mutant exhibited similar expression levels at  
129 the endpoint of the conversion, indicating that the mutant mostly accelerates the speed of BMT

130 without inducing an aberrant phenotype (**Figure S1D**). Moreover, the largest differences in gene  
131 expression values between wild type and mutant cells were observed at 1 and 3 hpi (**Figure**  
132 **S1D**). Hierarchical clustering of all the 11,780 differentially expressed genes throughout BMT  
133 yielded 8 clusters (**Figure 1G**). These could be separated into two large groups, with genes in  
134 clusters I, II, IV and VIII displaying faster activation by C/EBP $\alpha$ <sup>R35A</sup>, while clusters IV, V and VII  
135 showed faster silencing. Macrophage-myeloid related GO terms were enriched in clusters I and  
136 II (**Figures 1H, S1F**) and included the myeloid-restricted genes *Itgam* (encoding Mac-1) *Lyz2*  
137 (lysozyme), *Csf1r* (M-CSF receptor) and *Cd14* (**Figures 1G, S1G**). Conversely, B cell-related  
138 GO terms were enriched in cluster VII (**Figures 1I, S1F**) and included the B cell-restricted genes  
139 *Cd19*, *Pax5*, *Ebf1* and *Rag2* (**Figures 1G, S1G**). The kinetics of individual macrophage and B  
140 cell-associated genes (**Figure S1H**) further illustrate the C/EBP $\alpha$ <sup>R35A</sup>-induced BMT acceleration.

141 These results extend the findings obtained with B cell and macrophage cell surface markers  
142 to thousands of differentially regulated lineage-associated genes. The most dramatic differences  
143 in gene expression changes induced by C/EBP $\alpha$ <sup>R35A</sup> occurred within 3 hpi and then converged  
144 again at 120 hpi.

#### 145 **C/EBP $\alpha$ <sup>R35A</sup> accelerates chromatin remodelling at regulatory elements of lineage-** 146 **restricted genes**

147 Major gene expression changes are typically associated with extensive chromatin remodeling  
148 (Klemm et al., 2019). To study changes in chromatin accessibility occurring during BMT, we  
149 performed assays for Transposase-Accessible Chromatin using sequencing (ATAC-seq) at  
150 various time points after C/EBP $\alpha$ WT and C/EBP $\alpha$ R35A induction (**Figure 2A**)

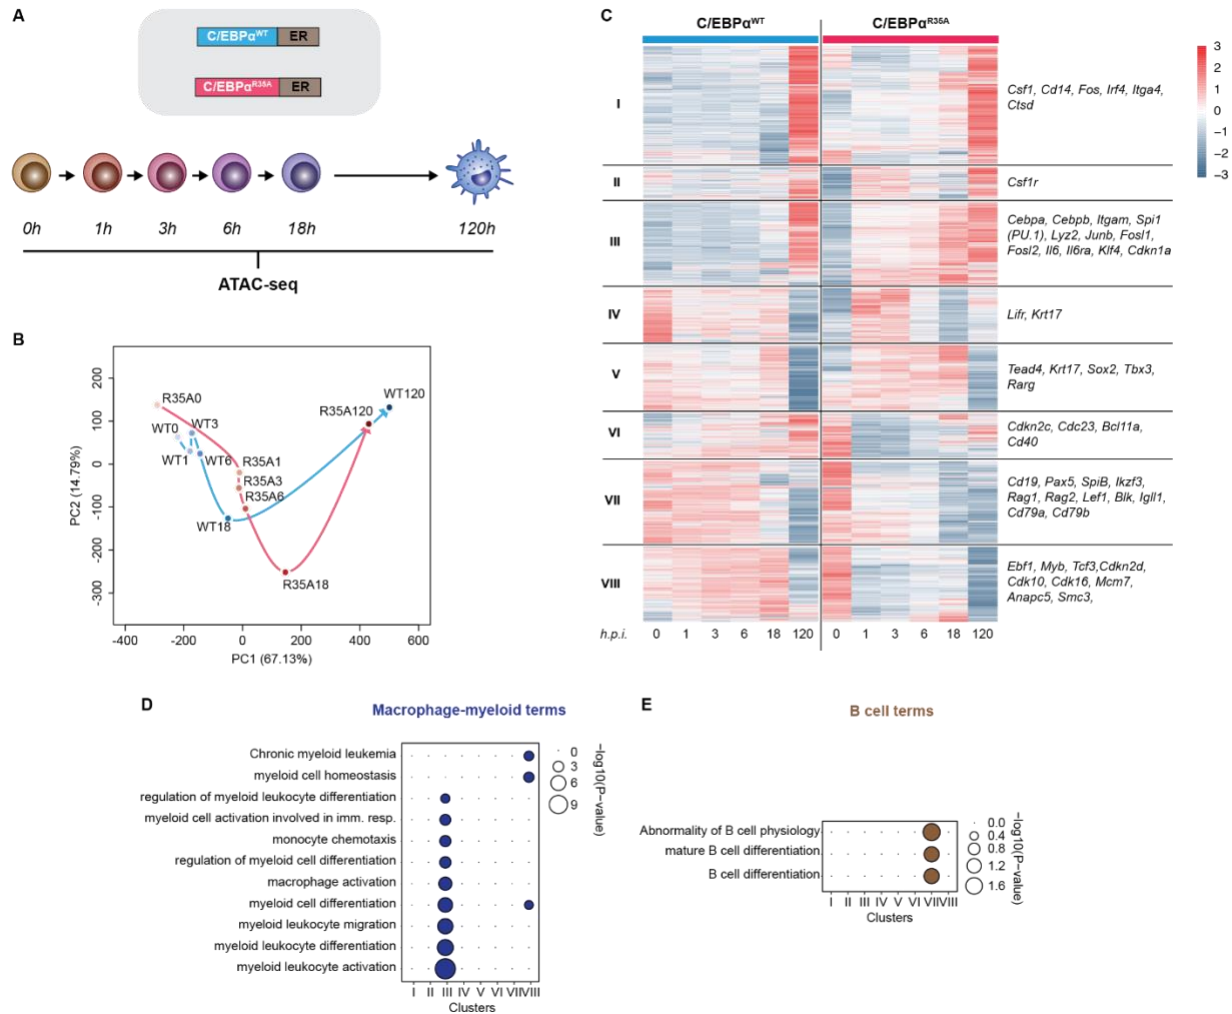

151  
 152 **Figure 2. C/EBP $\alpha^{R35A}$  accelerates chromatin accessibility at gene regulatory elements of lineage-restricted**  
 153 **genes. A.** Experimental approach used for chromatin accessibility profiling. B cells infected with either C/EBP $\alpha^{WT}$ -  
 154 or C/EBP $\alpha^{R35A}$ -ER retroviral constructs (n=2 biological replicates) were induced for the indicated times and  
 155 processed for ATAC-seq. **B.** PCA of differential chromatin accessibility dynamics during BMT induced by C/EBP $\alpha^{WT}$   
 156 (cyan) or C/EBP $\alpha^{R35A}$  (magenta), based on 91,830 ATAC-seq peaks differentially called for the two conditions.  
 157 Arrows connecting individual timepoints show trajectories. **C.** Hierarchical clustering of differentially accessible  
 158 promoters (14,233 peaks) with representative genes shown next to each cluster. **D-E.** Gene ontology analysis of  
 159 macrophage-myeloid (**D**) and B cell (**E**) terms of each cluster. Diameter of circles is proportional to the p-value. See  
 160 also **Figure S2**.

161 ATAC-seq revealed 91,830 peaks significantly different between wild type and mutant cells in at  
 162 least one time point, indicating differential chromatin accessibility. These regions fell into three  
 163 groups: a) faster opening Gene Regulatory Elements (GREs), with highest peaks at 120hpi  
 164 (43,429 peaks); b) faster closing GREs, with highest peaks at 0 hpi (36,380 peaks) and c)



165 transiently opening GREs with highest peaks at 18 hpi (12,021 peaks) (**Figure S2A, B**). While  
166 both opening and closing GREs showed a largely accelerated trend with C/EBP $\alpha$ <sup>R35A</sup>, transiently  
167 opening GREs showed only subtle differences between the two conditions (**Figure S2B**). PCA  
168 analysis of the differential ATAC peaks revealed an acceleration of chromatin accessibility by  
169 C/EBP $\alpha$ <sup>R35A</sup> (**Figure 2B**), with the 1-6 hpi C/EBP $\alpha$ <sup>R35A</sup> samples resembling the 18 hpi C/EBP $\alpha$ <sup>WT</sup>  
170 sample.

171 We then grouped the 14,233 differential peaks at promoter regions into eight clusters, with  
172 genes in clusters I, II and III exhibiting opening dynamics dramatically accelerated by  
173 C/EBP $\alpha$ <sup>R35A</sup>, while genes in clusters VII and VIII showing accelerated closing (**Figure 2C**). GO  
174 analysis revealed an enrichment of macrophage terms for cluster III (**Figure 2D**) and included  
175 the macrophage-restricted genes *Irgam* and *Lyz2* (**Figure 2C**). Quantification of accessibility  
176 changes in GREs (including promoters and enhancers of genes) in this cluster showed an  
177 accelerated chromatin opening by C/EBP $\alpha$ <sup>R35A</sup> at the early timepoints (exemplified by *Irgam* and  
178 *Lyz2* in **Figure S2C**). Conversely, the faster closing GREs in cluster VIII were enriched for B cell-  
179 related GO terms and included the B cell genes *Cd19*, *Pax5* and *Rag2* (**Figures 2C, E, S2D**).  
180 Differences in chromatin accessibility at these clusters were no longer apparent at 120 hpi  
181 (**Figures 2B, C**).

182 Overall, these results indicate that C/EBP $\alpha$ <sup>R35A</sup> is more efficient at inducing chromatin opening  
183 or closing at lineage-specific GREs compared to C/EBP $\alpha$ <sup>WT</sup>, consistent with the observed  
184 acceleration of gene expression changes (**Figure 1E-I**). Again, these differences are most  
185 pronounced at the earliest time points.

## 186 **Differentially opening and closing chromatin regions are enriched for PU.1 motif**

187 To test whether the accelerated changes in chromatin accessibility are due to differential DNA  
188 binding affinities, we performed an electrophoretic mobility shift assay with both proteins, using  
189 nuclear extracts from HEK-293T cells expressing either C/EBP $\alpha$ <sup>WT</sup> or C/EBP $\alpha$ <sup>R35A</sup>. These were  
190 incubated with an end-labeled oligonucleotide containing a palindromic C/EBP $\alpha$ -binding motif  
191 and run on an a native acrylamide gel. The intensity of the resulting bands corresponding to

192 C/EBP $\alpha$ <sup>WT</sup> and C/EBP $\alpha$ <sup>R35A</sup> complexes were similar, indicating that the mutation does not  
 193 significantly affect the DNA-binding capacity of the factor (**Figure 3A**).

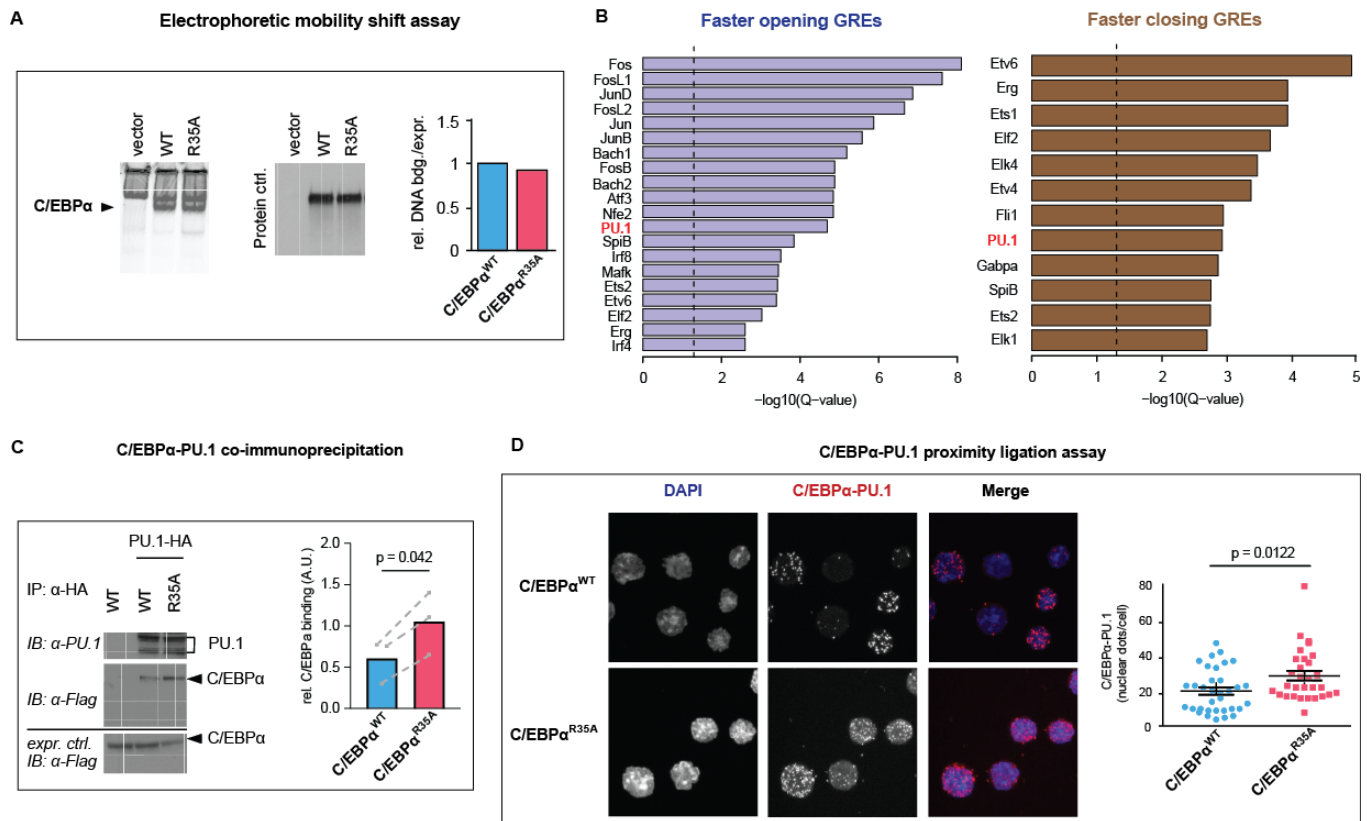

194  
 195 **Figure 3. C/EBP $\alpha$ <sup>R35A</sup> exhibits an increased affinity for PU.1.** **A.** Electrophoretic mobility shift assay with nuclear  
 196 extracts of HEK-293T cells transfected with either C/EBP $\alpha$ <sup>WT</sup> or C/EBP $\alpha$ <sup>R35A</sup> incubated with a fluorophore-labeled  
 197 oligonucleotide containing a palindromic C/EBP $\alpha$ -binding motif (left). Protein expression control of nuclear C/EBP $\alpha$   
 198 proteins by western blot (middle) and densitogram-based relative DNA binding versus protein expression (right). **B.**  
 199 Lists of the top *de novo* motifs in faster opening or closing GREs induced by C/EBP $\alpha$ <sup>R35A</sup> (**Figures S2A, B**), with the  
 200 PU.1 motif indicated in red. Dashed lines correspond to the significance threshold of Q-value ( $\leq 0.05$ ). **C.** Co-  
 201 immunoprecipitation of PU.1 and C/EBP $\alpha$  in HEK-293T cells transfected with either C/EBP $\alpha$ <sup>WT</sup> or C/EBP $\alpha$ <sup>R35A</sup> (left)  
 202 and quantification of interaction of three independent experiments (right). Values shown were normalized to the  
 203 expression of C/EBP $\alpha$  (mean + individual values). Dashed lines indicate paired values; statistical significance was  
 204 determined using a paired Student's t-test. **D.** Proximity ligation assay of C/EBP $\alpha$  and PU.1 in mouse B cells induced  
 205 with either C/EBP $\alpha$ <sup>WT</sup> or C/EBP $\alpha$ <sup>R35A</sup> for 24 hours. On the left, confocal microscopy images of the cells showing  
 206 nuclear dots. On the right, quantification of interactions by counting nuclear dots per cell (mean  $\pm$  s.e.,  $n=30-34$ ;  
 207 statistical significance determined using an unpaired Student's t-test). See also **Figure S3**.

208 Another possibility is that the altered chromatin remodeling capacity of C/EBP $\alpha$ <sup>R35A</sup> is due to  
 209 the differential interaction with another protein(s). In an attempt to find such potential interactors,  
 210 we performed a *de novo* motif discovery analysis with the differentially accessible GREs in the

211 three groups by matching them against known TF motifs (**Figure S2A and B**). Faster and  
212 transiently opening GREs were found to be strongly enriched for AP-1/leucine zipper family TF  
213 motifs (c-Fos, c-Jun and JunB), a family of factors known to be able to heterodimerize with  
214 C/EBP $\alpha$  to activate myeloid genes (D. H. Cai et al., 2008). In contrast, faster closing GREs were  
215 mostly enriched for ETS family TF motifs such as Ets1, Fli1, SpiB and Gabpa, known to be  
216 associated with B cell lineage differentiation and function (Eyquem et al., 2004; Hu et al., 2001;  
217 Xue et al., 2007; Zhang et al., 2008a). Several motifs were also enriched in both the accelerated  
218 chromatin opening and closing groups, including that of PU.1 and the closely related factor Spi-  
219 B (**Figures 3B, S3A**). Conversely, the transiently opening regions were enriched for AP-1 motifs  
220 but not for PU.1 (**Figure S3B**).

221 These observations show that chromatin regions more rapidly opened by C/EBP $\alpha$ <sup>R35A</sup> are  
222 enriched for AP-1 family binding motifs in line with the synergism between C/EBP $\alpha$  and AP-1  
223 family factors during myeloid differentiation (D H Cai et al., 2008). Conversely, the association of  
224 Ets family motifs with more rapidly closed regions might reflect the role of Fli1, Spi-B and in B  
225 cell differentiation (Zhang et al., 2008b). That the PU.1 motif is shared between faster opening  
226 and closing regions might reflect its dual roles in the two lineages (Scott et al., 1994; Singh et  
227 al., 1999).

### 228 **C/EBP $\alpha$ <sup>R35A</sup> exhibits an increased affinity for PU.1**

229 Since PU.1 is a necessary partner of C/EBP $\alpha$  during myeloid cell specification (Heinz et al., 2010;  
230 van Oevelen et al., 2015; Xie et al., 2004a) in the following we focused on the role of PU.1 during  
231 BMT. To test whether arginine 35 modulates the interaction of C/EBP $\alpha$  with PU.1, we performed  
232 co-immunoprecipitation experiments with cellular extracts from HEK293-T cells co-transfected  
233 with PU.1 and either WT or mutant C/EBP $\alpha$ . This revealed an approximately 2-fold increase in  
234 the interaction between C/EBP $\alpha$ <sup>R35A</sup> and PU.1 compared to C/EBP $\alpha$ <sup>WT</sup> (**Figure 3C**). Also,  
235 proximity ligation assays showed a stronger interaction between PU.1 and C/EBP $\alpha$ <sup>R35A</sup>  
236 compared to C/EBP $\alpha$ <sup>WT</sup>, as determined by a significantly higher number of fluorescent nuclear  
237 dots (**Figure 3D**). These results therefore indicate that a mutation of C/EBP $\alpha$ <sup>R35</sup> increases the  
238 factor's affinity for its obligate partner PU.1.

### 239 **C/EBP $\alpha$ <sup>R35A</sup> shows an increased synergy with PU.1 in fibroblasts**

240 We have previously shown that C/EBP $\alpha$  synergizes with PU.1 in converting NIH 3T3 fibroblasts  
241 into macrophage-like cells (Feng et al., 2008a) (**Figure 4A**). Therefore, to determine how the  
242 mutant behaves in this system, we generated NIH 3T3-derived cell lines (3T3aER-R and  
243 3T3aER-A) stably expressing inducible forms of C/EBP $\alpha^{WT}$  or C/EBP $\alpha^{R35A}$ , respectively. These  
244 lines were then infected with a constitutive PU.1 retroviral construct, treated with  $\beta$ -est, and Mac-  
245 1 levels monitored by FACS at various times post-induction. As described earlier (Feng et al.,  
246 2008b), the combination of C/EBP $\alpha^{WT}$  with PU.1 activated Mac-1 expression while the individual  
247 constructs did not (**Figures 4B, S4A, B**). Importantly, C/EBP $\alpha^{R35A}$  synergized with PU.1 more  
248 strongly than C/EBP $\alpha^{WT}$  in activating Mac-1 (**Figures 4B, S4A**). In addition, cells co-expressing  
249 PU.1 and C/EBP $\alpha^{R35A}$  exhibited dramatic morphological changes, with cells co-expressing PU.1  
250 and C/EBP $\alpha^{WT}$  displaying more subtle alterations (**Figure S4C**).

### 251 **Single-molecule tracking experiments in fibroblasts show a PU.1-enhanced chromatin** 252 **opening by C/EBP $\alpha^{R35A}$**

253 To explore whether also in fibroblasts the two forms of C/EBP $\alpha$  exhibit differences in  
254 chromatin opening and how this is influenced by PU.1, we performed single-molecule tracking  
255 (SMT) experiments. This allows to visualize the Brownian-like movement of individual TF  
256 molecules and their interaction with open and closed chromatin (Lerner et al., 2020; Liu and  
257 Tjian, 2018) (**Figure 4C**). For this purpose, we generated NIH3T3 cells expressing doxycycline-  
258 inducible Halo-tagged histone H2B, C/EBP $\alpha^{WT}$  or C/EBP $\alpha^{R35A}$ . After induction for either 6h or 24h  
259 these cells were used to perform SMT on ~50 cells per condition and 20,000 single-molecule  
260 motion tracks were randomly down-sampled in triplicates to compare each condition (Chen et  
261 al., 2014). Monitoring the radius of confinement and average displacement of histone H2B  
262 allowed us to define low and high mobility chromatin, corresponding to closed and open states,  
263 respectively (Lerner et al., 2020) (**Figure S4D**).

264 Similar two-parameter assessment of motion tracks of C/EBP $\alpha^{WT}$  and C/EBP $\alpha^{R35A}$  showed  
265 that after 6 hpi, both TFs display interactions with low mobility (closed) chromatin, with  
266 C/EBP $\alpha^{R35A}$  showing a slightly increased interaction (**Figure 4D**). This observation is consistent  
267 with the elevated affinity for nucleosomes of C/EBP $\alpha$  measured *in vitro* (Fernandez Garcia et al.,  
268 2019; Lerner et al., 2020). At 24 hpi, both C/EBP $\alpha^{WT}$  and C/EBP $\alpha^{R35A}$  showed a decreased  
269 interaction with low mobility chromatin and increased interaction with high mobility chromatin

270 (Figure 4D). This transition to higher mobility chromatin suggests an opening of regions bound  
 271 by C/EBP $\alpha$ , consistent with the known pioneering function of C/EBP $\alpha$  (Fernandez Garcia et al.,  
 272 2019).

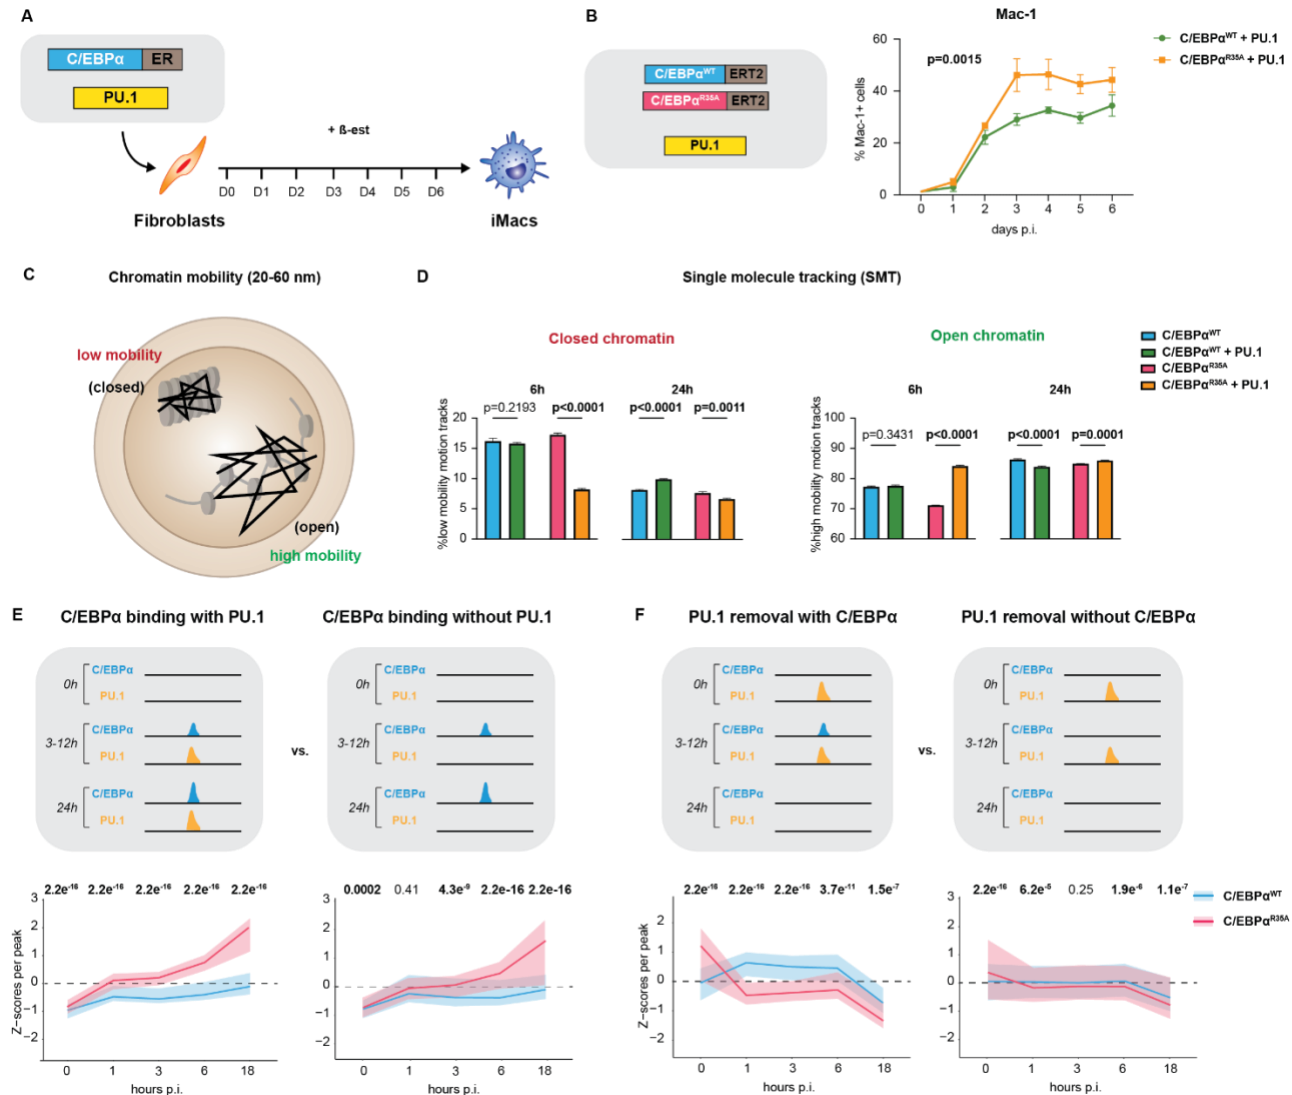

273  
 274 **Figure 4. C/EBP $\alpha^{R35A}$  shows an enhanced synergy with PU.1 and hastens its relocation from B cell to myeloid**  
 275 **GREs. A.** Schematic representation of TF-induced fibroblast to macrophage transdifferentiation. NIH3T3 fibroblasts  
 276 were infected C/EBP $\alpha^{WT}$ -ER or C/EBP $\alpha^{R35A}$ -ER in the presence or absence of PU.1 construct. Cells were induced  
 277 with  $\beta$ -est for the indicated times, causing a conversion to macrophage-like cells (iMacs) within 6 days p.i. **B.**  
 278 Kinetics of induced transdifferentiation as monitored by Mac-1 expression by FACS (mean  $\pm$  s.d., n=3; statistical  
 279 significance was determined using two-way ANOVA). **C.** Schematic representation of single molecule movements  
 280 of TFs bound to closed (low mobility) or open (high mobility) chromatin. **D.** Quantification of single cell motion tracks  
 281 (mean  $\pm$  s.d., n=3 x 20,000 randomized down sampled motion tracks; statistical significance determined using two-  
 282 way ANOVA with multiple comparisons). **E, F.** Virtual chromatin immunoprecipitation of C/EBP $\alpha$  and PU.1 during

283 BMT induced either by C/EBP $\alpha$ <sup>WT</sup> or C/EBP $\alpha$ <sup>R35A</sup> for the indicated times, showing schematics of peaks illustrating  
284 the different conditions tested. **E**, Selected regions corresponding to sites that are devoid of C/EBP $\alpha$  and PU.1 in B  
285 cells and become bound by both factors (left) or only by C/EBP $\alpha$  (right) throughout BMT. **F** Selected regions  
286 corresponding to sites where PU.1 is bound in B cells and either removed by transient binding of C/EBP $\alpha$  (left) or  
287 by another mechanism during BMT (right). See also **Figure S4**. Data were computed from ATAC-seq experiments  
288 (**Figure 2**) and from ChIP-seq of C/EBP $\alpha$  and PU.1 in B cells induced with  $\beta$ -est for 0, 3, 12 and 24 hours (van  
289 Oevelen et al., 2015). Plots on the bottom show chromatin accessibility Z-scores per ATAC peak of B cells induced  
290 with either wild type (cyan) or mutant C/EBP $\alpha$  (magenta) at different hpi (line=median; shaded background=IQR;  
291 statistical significance was determined using a Wilcoxon signed-rank test).

292 We then tested the effect of PU.1 co-expression on interactions of C/EBP $\alpha$  with open or  
293 closed chromatin. At 6 hpi C/EBP $\alpha$ <sup>R35A</sup> cells co-expressing PU.1 displayed a dramatic decrease  
294 in interaction with low mobility chromatin concomitantly with increased interaction with higher  
295 mobility chromatin, while PU.1 co-expression had little effect on the mobility of C/EBP $\alpha$ <sup>WT</sup>. This  
296 suggests a faster chromatin opening by C/EBP $\alpha$ <sup>R35A</sup> at sites bound by PU.1 (**Figure 4D and F**).  
297 The observed differences between C/EBP $\alpha$ <sup>WT</sup> and C/EBP $\alpha$ <sup>R35A</sup> co-expressing PU.1 essentially  
298 disappeared after 24h, suggesting that the two protein complexes open closed chromatin at  
299 different speeds but reach similar endpoints (**Figure 4D and E**).

300 These results show that in 3T3 cells C/EBP $\alpha$ <sup>R35A</sup> displays an enhanced synergism with  
301 PU.1 in that the complex induces a faster chromatin opening than the C/EBP $\alpha$ <sup>WT</sup>-PU.1 complex,  
302 coincident with stronger activation of macrophage markers and induced cell morphology  
303 changes.

### 304 **C/EBP $\alpha$ <sup>R35A</sup> hastens the relocation of PU.1 from B cell to macrophage enhancers during** 305 **BMT induction**

306 The data described raised the possibility that C/EBP $\alpha$  causes a relocation of PU.1 from B cell to  
307 macrophage regulatory regions and that the mutant, through its enhanced interaction with PU.1,  
308 is more efficient at doing so. This hypothesis predicts that C/EBP $\alpha$ <sup>R35A</sup> binding to GREs occupied  
309 by PU.1 should induce stronger changes in chromatin accessibility than C/EBP $\alpha$ <sup>WT</sup>, while sites  
310 devoid of PU.1 should behave more similarly. To test this, we performed a virtual ChIP-seq  
311 analysis of C/EBP $\alpha$  and PU.1 during BMT, combining previously generated ChIP-seq data (van  
312 Oevelen et al., 2015) with our new ATAC-seq data. We first identified regions stably bound by  
313 C/EBP $\alpha$  throughout BMT and then distinguished sites already occupied by PU.1 from PU.1-free

314 sites. This revealed that C/EBP $\alpha$ <sup>R35A</sup> induces a significant acceleration of chromatin *opening* at  
315 PU.1-bound regions compared to C/EBP $\alpha$ <sup>WT</sup>, while regions bound by C/EBP $\alpha$  alone showing  
316 much smaller differences (**Figure 4E**). Next, we focused on sites where PU.1 is removed by  
317 transiently bound by C/EBP $\alpha$ , distinguishing them from sites where PU.1 is removed yet no  
318 C/EBP $\alpha$  binding was detected at any timepoint. This showed that transient binding of C/EBP $\alpha$ <sup>R35A</sup>  
319 accelerated PU.1 displacement and chromatin closing at PU.1-bound regions. In contrast,  
320 although PU.1 was also still removed at sites not targeted by C/EBP $\alpha$ , the effect was much milder  
321 (**Figure 4F**).

322 Altogether, our results are consistent with the hypothesis that during BMT, C/EBP $\alpha$  ‘steals’  
323 endogenous PU.1 from B cell GREs and relocates it to myeloid GREs, thereby essentially  
324 converting PU.1 from a B cell regulator to a myeloid regulator. This ‘stealing’ is exacerbated by  
325 C/EBP $\alpha$ <sup>R35A</sup>, which is able to more efficiently relocate PU.1, in line with the SMT results obtained  
326 in fibroblasts.

### 327 **Carm1 asymmetrically dimethylates arginine 35 of C/EBP $\alpha$ and decreases its affinity for** 328 **PU.1**

329 The finding that a mutation in a specific arginine of C/EBP $\alpha$  is responsible for the observed  
330 BMT acceleration raised the possibility that the phenotype is caused by the loss of its potential  
331 to be methylated. Since asymmetric dimethylation is one of the most common arginine  
332 modifications (Bedford and Clarke, 2009; Bedford and Richard, 2005), we first determined  
333 whether R35 is asymmetrically dimethylated. To this end, we generated two cell lines named  
334 BLaER2 and BLaER2-A, derived from the B-ALL line RCH-ACV (Jack et al., 1986) expressing  
335 the 4-hydroxytamoxifen (4-OHT)- inducible constructs C/EBP $\alpha$ <sup>WT</sup>-ERT2 and C/EBP $\alpha$ <sup>R35A</sup>-ERT2,  
336 respectively. We then induced these cells for 24h with 4-OHT, immunoprecipitated C/EBP $\alpha$ , and  
337 ran a Western with an antibody specific for asymmetrically dimethylated arginine (aDMA)-  
338 containing proteins. The antibody detected C/EBP $\alpha$ <sup>WT</sup> but not C/EBP $\alpha$ <sup>R35A</sup>, thus revealing that  
339 arginine 35 is asymmetric dimethylated (**Figure 5A**). We next co-transfected HEK293-T cells  
340 with either C/EBP $\alpha$ <sup>WT</sup> or C/EBP $\alpha$ <sup>R35A</sup> and several type I Prmts, namely Prmt1, 3, 4 (Carm1) and  
341 6; and assessed the methylation status of C/EBP $\alpha$ . Only Carm1 was able to induce methylation  
342 of C/EBP $\alpha$ <sup>WT</sup> while C/EBP $\alpha$ <sup>R35A</sup> remained unmethylated (**Figures 5B, S5A**).

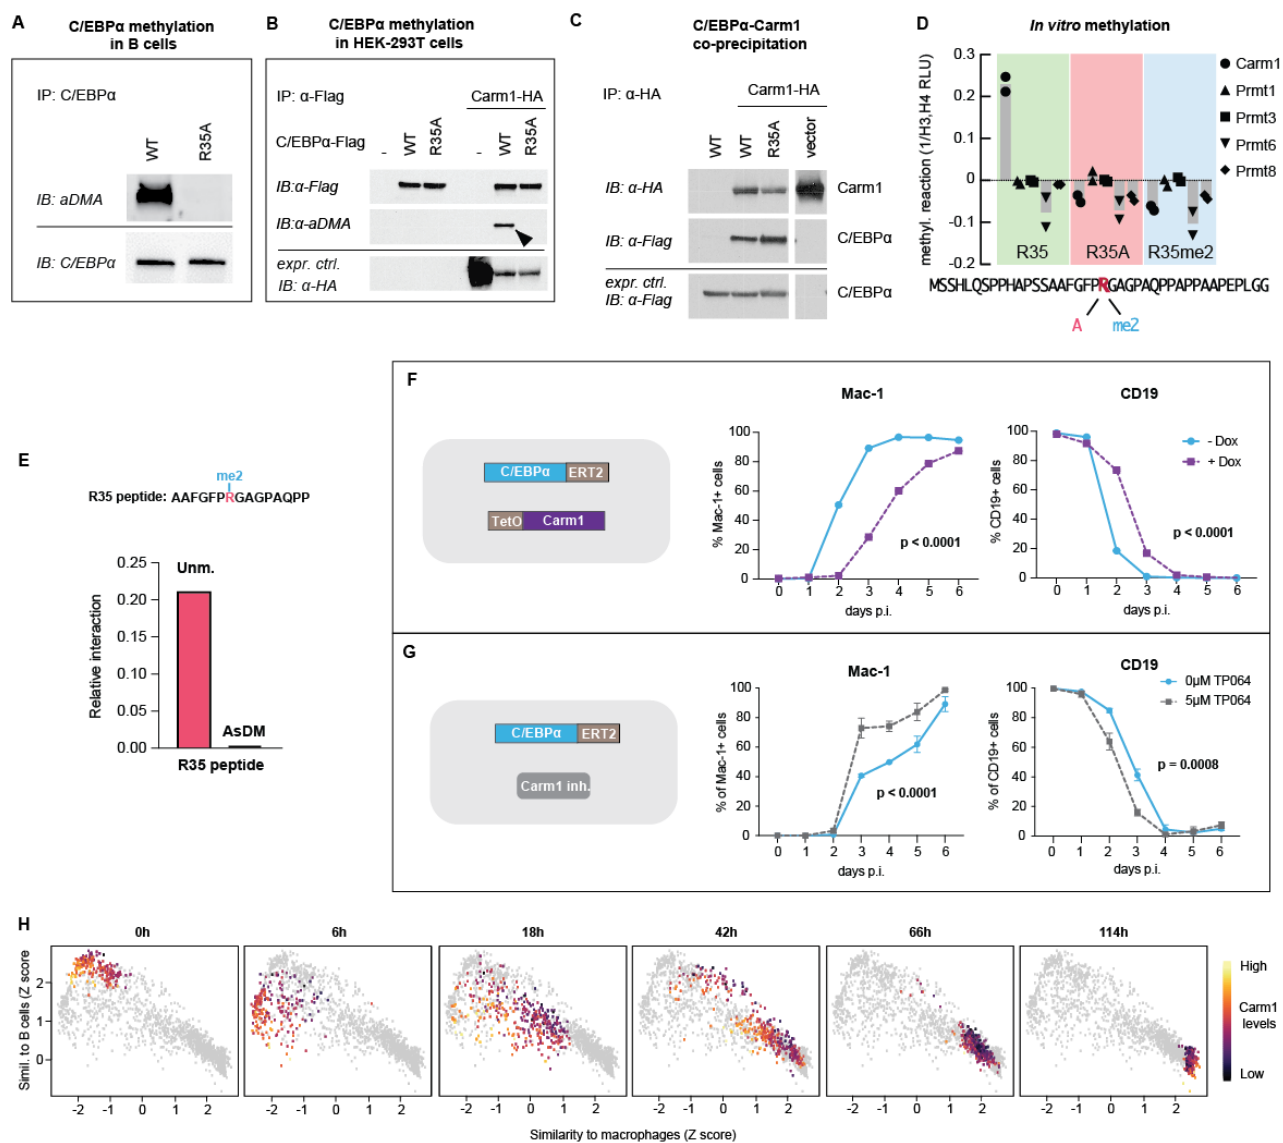

343

344

345

346

347

348

349

350

351

352

353

354

355

**Figure 5. Carm1 asymmetrically dimethylates arginine 35 and regulates the speed of C/EBPα-induced BMT.**

**A.** Immunoprecipitation (IP) and immunoblotting (IB) of C/EBPα and asymmetrically dimethylated arginine (aDMA) containing proteins. **B.** Immunoprecipitation of C/EBPα from HEK293T cells co-transfected with either C/EBPα<sup>WT</sup>-Flag or C/EBPα<sup>R35A</sup>-Flag with or without Carm1-HA, followed by immunoblot with antibodies against aDMA, Flag and HA. **C.** Immunoprecipitation of Carm1 from HEK293T cells co-transfected with either C/EBPα<sup>WT</sup>-Flag or C/EBPα<sup>R35A</sup>-Flag and Carm1-HA, followed by immunoblot with antibodies against Flag and HA. **D.** *In vitro* methylation assays with recombinant Carm1, Prmt1, Prmt3, Prmt6 or Prmt8 proteins together with C/EBPα peptides (aa 15-54) that contain either unmethylated arginine 35 (green), with an alanine replacement (A, magenta), or asymmetrically dimethylated (me2, cyan) (mean and individual values are displayed, n=2). **E.** Interaction with PU.1 of a 14-mer peptide (top) containing either an unmethylated (Unm.) or an asymmetrically dimethylated arginine (me, AsDM). The data were extracted from (Ramberger et al., 2021). **F.** Effect of Carm1 overexpression on BMT kinetics of human B cells measured by Mac-1 and CD19 expression (mean ± s.d., n=3, statistical significance was



356 determined using two-way ANOVA). **G.** Same as F, but effect of Carm1 inhibition by 5 $\mu$ M of TP064. **H.** Correlation  
357 of Carm1 expression levels in single cell trajectories with B cell and macrophage states. Data extracted from  
358 previously published work (Francesconi et al., 2019).

359 To rule out the possibility that the R35 mutation is impaired in its interaction with Carm1 we  
360 performed Co-IP experiments in HEK293-T cells co-transfected with Carm1 and either  
361 C/EBP $\alpha$ <sup>WT</sup> or C/EBP $\alpha$ <sup>R35A</sup>, which showed that both proteins are able to interact with the enzyme  
362 (**Figure 5C**). To quantitatively assess the interaction of C/EBP $\alpha$ <sup>WT</sup> and C/EBP $\alpha$ <sup>R35A</sup> with Carm1  
363 we performed a PLA assay. For this, NIH3T3 cell lines carrying ER fusions of C/EBP $\alpha$ <sup>WT</sup> and  
364 C/EBP $\alpha$ <sup>R35A</sup> were induced with  $\beta$ -est for 24 hours and subjected to the assay, involving staining  
365 with antibodies to C/EBP $\alpha$  and PU.1. We observed nuclear dots in both lines, with slightly higher  
366 numbers in C/EBP $\alpha$ <sup>R35A</sup> cells, supporting the notion that both forms of C/EBP $\alpha$  can interact with  
367 Carm1 (**Figure S5B**).

368 To further assess the enzyme's specificity, we performed an *in vitro* methylation assay using  
369 synthetic peptides (10-14-mers), covering all 20 arginine residues of C/EBP $\alpha$ . Only the peptide  
370 containing arginine 35 showed a methylation signal (**Figure S5C**). We also performed an *in vitro*  
371 methylation assay using a C/EBP $\alpha$  peptide spanning amino acids 15-54 and containing either  
372 unmethylated R35, asymmetrically di-methylated R35 or an alanine replacement in the presence  
373 of either Carm1, Prmt1, Prmt3, Prmt6 or Prmt8. Only Carm1 was able to methylate the peptide  
374 with the original arginine, while no methylation was detected with the other Prmts and with  
375 peptides containing methylated R35 or an alanine replacement (**Figure 5D**). Finally, we  
376 investigated whether the methylation status of C/EBP $\alpha$  affects its affinity for PU.1, analyzing the  
377 interaction data from a peptide motif-based C/EBP $\alpha$  interactome screen (Protein interaction  
378 Screen on Peptide Matrix, PRISMA) (Ramberger et al., 2021) comparing an unmethylated  
379 peptide with a peptide containing an asymmetrically dimethylated arginine. This showed an  
380 impaired interaction of PU.1 with the methylated compared to the unmethylated peptide (**Figure**  
381 **5E**).

382 These results indicate that Carm1 selectively targets arginine 35 of C/EBP $\alpha$  and that the  
383 Carm1-mediated asymmetric dimethylation of this residue decreases the factor's affinity for  
384 PU.1.

385 **Carm1-mediated methylation of arginine 35 modulates C/EBP $\alpha$ -induced BMT**

386 To test the effect of Carm1-mediated methylation of C/EBP $\alpha$  on the factor's ability to induce  
387 BMT, we performed Carm1 gain and loss of function experiments. First, we generated a stable  
388 derivative of the BLaER2 cell line (named RRC3) that contains the reverse tetracycline  
389 transactivator and a doxycycline (Dox)-inducible Carm1 construct. A Western blot confirmed  
390 robust Carm1 expression 24 hours after Dox treatment (**Figure S5D**). Assessing the effects of  
391 Carm1 overexpression on the kinetics of 4-OHT-induced BMT showed a dramatic delay in both  
392 Mac-1 activation and CD19 silencing (**Figure 5F, S6A**). Next, we tested the effect of the Carm1  
393 inhibitor TP064 (Nakayama et al., 2018). After verifying that 5 $\mu$ M of the drug impairs the  
394 asymmetric dimethylation of BAF155 (**Figure S5E**), a known target of Carm1 (Wang et al., 2014)  
395 we found that 4-OHT-induced RRC3 cells treated with 5 $\mu$ M TP064 resulted in a strongly  
396 accelerated BMT (**Figures 5G, S6B**). In contrast, and importantly, C/EBP $\alpha$ <sup>R35A</sup>-mediated BMT  
397 was not delayed by Carm1 overexpression (**Figures S5F, S6C**) nor did the Carm1 inhibitor cause  
398 an acceleration (**Figures S5G, S6D, E**).

399 Our results therefore indicate that high Carm1 expression levels cause a delay in the  
400 kinetics of C/EBP $\alpha$ -induced BMT by acting on R35A, in line with the findings obtained with  
401 C/EBP $\alpha$  mutant.

#### 402 **Differences of endogenous Carm1 expression correlate with the speed of BMT induction**

403 To investigate the effect of naturally occurring differences in Carm1 expression on BMT  
404 velocity, we used a previously generated single-cell gene expression dataset of cells undergoing  
405 BMT (Francesconi et al., 2019). For this, we monitored Carm1 expression during the BMT  
406 trajectory of single cells by following their similarity to either B cells or macrophages. This showed  
407 that cells with the lowest Carm1 levels were faster in acquiring a macrophage-like identity than  
408 cells with higher levels (**Figure 5H**). The differences leveled off between 42 and 66 hpi,  
409 suggesting that the largest differences occur in the early stages of BMT, in line with the  
410 observation that the kinetics of altered gene expression induced by C/EBP $\alpha$ <sup>WT</sup> and C/EBP $\alpha$ <sup>R35A</sup>  
411 differ mostly at the beginning of the process (**Figure 1F**). These results further support the notion  
412 that Carm1-mediated methylation of arginine 35 modulates the velocity of C/EBP $\alpha$ -induced BMT.

#### 413 **Carm1 inhibition biases GMPs to differentiate towards macrophages**

414 To assess the potential of Carm1 to regulate cell fate decisions during normal myelopoiesis  
415 (**Figure 6A**), we investigated Carm1 RNA expression levels in different myeloid precursors as

416 well as granulocytes and macrophages, using a dataset obtained earlier (Choi et al., 2019). This  
 417 revealed a gradual decrease of Carm1 during the transition from common myeloid progenitors  
 418 (CMPs) over GMPs to monocytes and granulocytes (**Figure S7A**). Next, we monitored the levels  
 419 of AsDM-BAF155 as a proxy for Carm1 activity in sorted GMPs, granulocytes and monocytes  
 420 relative to total BAF155. We observed the highest relative levels of AsDM-BAF155 in GMPs and  
 421 a 3.5- and 4.5-fold reduction in granulocytes and monocytes, respectively (**Figure 6B, Figure**  
 422 **S7B**). These results suggest that Carm1 RNA levels and enzymatic activity decrease during  
 423 myeloid differentiation, reaching their lowest levels at in monocyte/macrophages.

424 To determine whether Carm1 activity affects the decision of GMPs to differentiate into either  
 425 granulocytes or monocytes, we tested the effect of the Carm1 inhibitor TP064 in a colony assay.  
 426 For this, we isolated GMPs from mouse bone marrow and seeded them in a semisolid medium  
 427 containing IL-3 and IL-6 in the presence of 0, 1, 2.5 or 10 $\mu$ M TP064. Scoring the number of the  
 428 different myeloid colony types 12 days later showed a dose-dependent reduction of granulocytic  
 429 colonies (CFU-G;  $p=0.001$ ) and a concomitant increase of monocytic colonies (CFU-M;  
 430  $p=0.0003$ ), with no effect on mixed colonies (CFU-GM;  $p=0.506$ ) (**Figure 6C**). This bias is unlikely  
 431 due to a granulocyte-selective cytotoxicity of the inhibitor since the total number of colonies  
 432 remained essentially constant (**Figure S7C**).

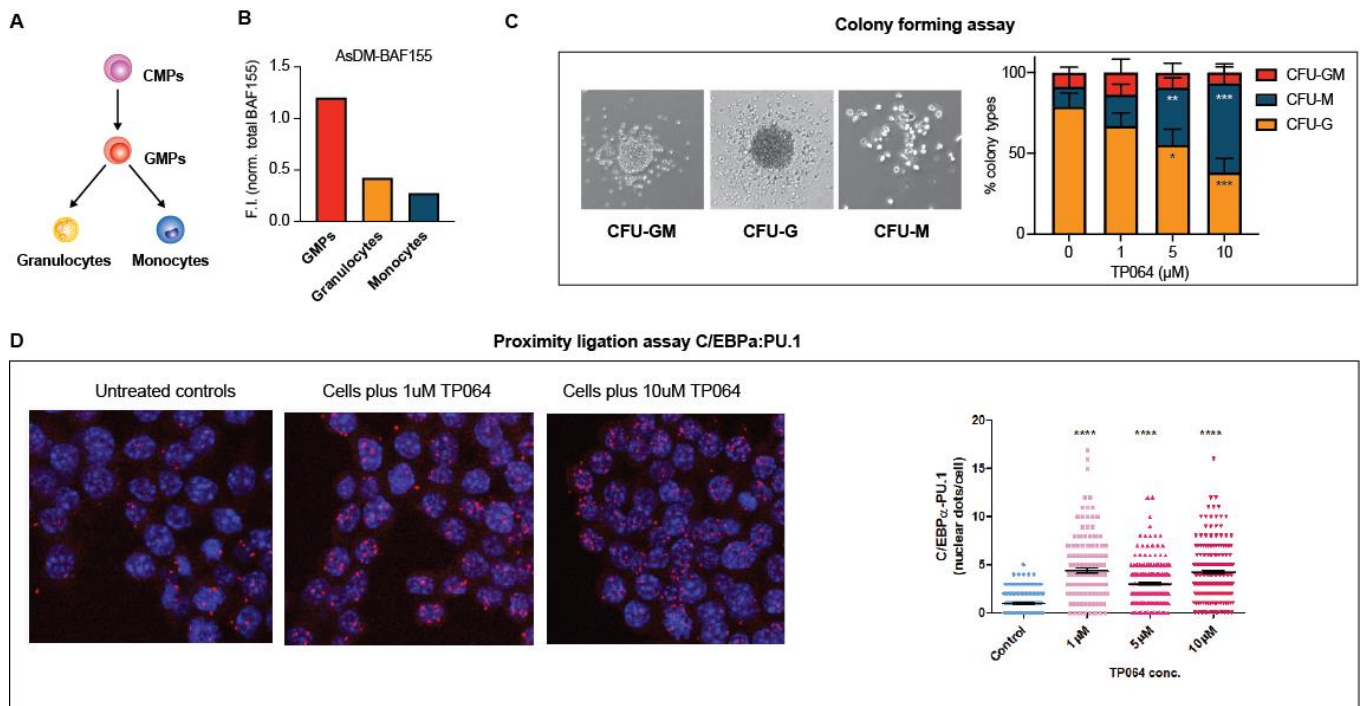

433  
 434 **Figure 6. Effect of Carm1 activity on myeloid differentiation and C/EBP $\alpha$ -PU.1 interaction. A.** Simplified

435 representation of myeloid differentiation. Common myeloid progenitors (CMPs); granulocyte-macrophage  
436 progenitors (GMPs). **B.** Levels of asymmetrically dimethylated BAF155 (AsDM-BAF155) relative to total BAF155 in  
437 GMPs, granulocytes and monocytes as a proxy for Carm1 activity (see also **Figure S6B**). **C.** On the left,  
438 representative images of colony types obtained from GMPs grown in Methocult. On the right, quantification of colony  
439 numbers obtained in cultures without or with various concentrations of the Carm1 inhibitor TP064 for 14 days,  
440 showing percentage of bipotent (CFU-GM), monocytic (CFU-M) and granulocytic (CFU-G) colonies (mean  $\pm$  s.d.,  
441  $n=3-4$ , statistical significance was determined using a one-way ANOVA for each cell type) (See also **Figure S6C**).  
442 **D.** Proximity ligation assay of endogenous C/EBP $\alpha$  and PU.1 in the mouse macrophage cell line RAW 264.7 treated  
443 for 24 hours with 1 or 10 $\mu$ M TP064 or left untreated. On the left confocal microscopy images of the cells shown. On  
444 the right, counts of nuclear dots per cell (mean  $\pm$  s.e.,  $n=149-190$  cells per condition) (statistical significance  
445 determined using an unpaired Student's t-test).

446 Together, our results suggest that Carm1 modulates the directionality of GMPs, with  
447 unmethylated C/EBP $\alpha$  biasing them to differentiate towards the monocytic lineage and implying  
448 a role of methylated C/EBP $\alpha$  for the granulocytic lineage.

#### 449 **Carm1 inhibition increases interaction between endogenous C/EBP $\alpha$ and PU.1**

450 The experiments described so far, showing an increased affinity between C/EBP $\alpha$  with a  
451 mutated or an unmethylated R35 and PU.1, were performed after C/EBP $\alpha$  overexpression. To  
452 determine whether an increase in affinity can also be observed between endogenous C/EBP $\alpha$   
453 and PU.1 we tested the effect of Carm1 inhibition on the mouse macrophage line RAW 264.7  
454 (Raschke et al., 1978). For this, the cells were cultured either in the absence or in presence of  
455 1,5 or 10 $\mu$ M of TP064 and subjected to a PLA assay. We observed low numbers of nuclear dots  
456 in the untreated cells and a 4 to 5 fold increase in both cultures treated with the inhibitor (**Figure**  
457 **6D**). This increase was not due to elevated levels of the two proteins in the presence of the  
458 inhibitor, as shown by similar immunofluorescence intensities of C/EBP $\alpha$  and PU.1 (**S7D**). We  
459 conclude that Carm1 inhibition increases the interaction between endogenous C/EBP $\alpha$  and  
460 PU.1, using a macrophage line expressing the two proteins at a similar level.

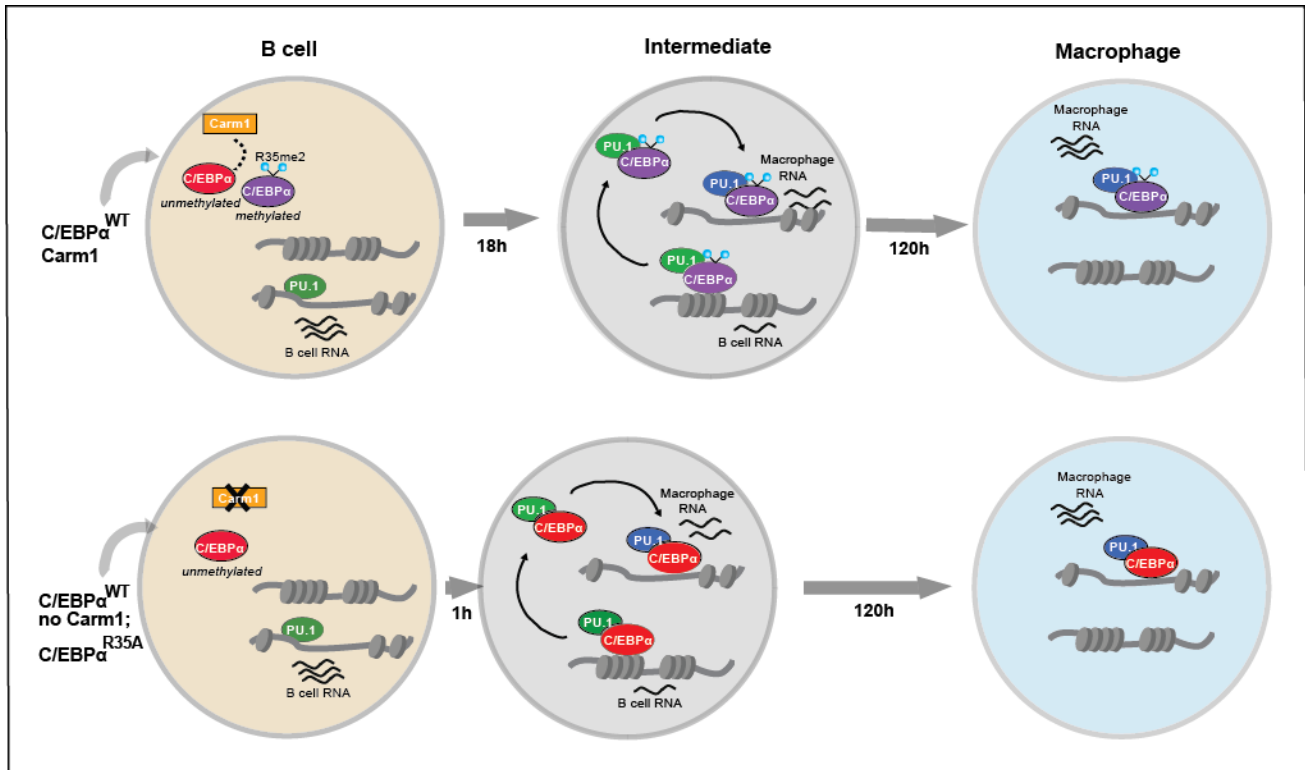

461

462

463

464

465

466

467

468

469

470

471

472

473

**Figure 7. Proposed mechanism of how Carm1 modulates the velocity of BMT.** The figure shows the C/EBP $\alpha$ -induced transdifferentiation of a B cell into a macrophage via an intermediate. In condition 1, cells are induced with C/EBP $\alpha^{WT}$  in the presence of Carm1 (upper part). In condition 2 (lower part) cells were induced with either C/EBP $\alpha^{WT}$  in the absence of Carm1 or with C/EBP $\alpha^{R35A}$ . Note the more rapid conversion into an intermediate of the cells in the second condition, in which unmethylated C/EBP $\alpha$  induces an accelerated silencing of B cell genes and activation of myeloid genes. We hypothesize that during induced gene silencing C/EBP $\alpha$  transiently binds to gene regulatory elements (GREs) of B cells occupied by PU.1 and B cell transcription factors. This leads to the release of the factors, including the C/EBP $\alpha$ :PU.1 complex, chromatin closing and silencing of B cell gene expression. C/EBP $\alpha$ :PU.1 complexes then relocate to myeloid GREs, where they induce chromatin opening and activation of macrophage gene expression. Carm1-mediated methylation of arginine 35 delays the BMT by impairing the interaction of C/EBP $\alpha$  with PU.1 and relocation of PU.1 to myeloid GREs. The green symbol for PU.1 implies its role as a B cell regulator, blue as a myeloid regulator.

474

## DISCUSSION

475

476

477

478

479

Here we describe a mechanism by which the speed of a hematopoietic cell fate decision is modulated. Using a model system in which a B cell to macrophage transdifferentiation (BMT) can be induced by C/EBP $\alpha$  we found that an arginine 35 mutant induces a dramatically accelerated BMT. As summarized in Figure 7, our data, together with that of earlier work (van Oevelen et al., 2015) suggest that C/EBP $\alpha$  initiates B cell gene silencing by binding to

480 specific GREs, a subset of which occupied by PU.1 in addition to B cell restricted regulatory  
481 factors. This binding is transient and leads to the rapid release of the complex from chromatin by  
482 an unknown mechanism. The free C/EBP $\alpha$ -PU.1 complex in turn translocates to macrophage-  
483 specific GREs, inducing chromatin opening and the activation of myeloid genes. During this  
484 relocation, PU.1 essentially switches from a B cell regulator to a myeloid regulator, now binding  
485 to a set of largely myeloid-specific GREs. The speed of this conversion is regulated by the levels  
486 of Carm1 in the starting cell, which determines the proportion of methylated or unmethylated  
487 arginine C/EBP $\alpha$  at R35. In this 'stealing' model the C/EBP $\alpha$ <sup>R35A</sup> mimics the unmethylated form  
488 of the factor, showing a stronger affinity for PU.1 than wild type C/EBP $\alpha$ . This model surely  
489 represents an oversimplification and does not explain, for example, how PU.1 becomes removed  
490 during BMT from B cell GREs that are not detectably bound by C/EBP $\alpha$ .

491 The observed near symmetrical acceleration of activation and silencing of B cell and  
492 myeloid-restricted genes induced by C/EBP $\alpha$ <sup>R35A</sup> or by C/EBP $\alpha$ <sup>WT</sup> in cells with reduced Carm1  
493 activity suggests that PU.1 acts as a cell fate coordinator, preventing the formation of cells with  
494 aberrantly regulated lineage programs. Whether during the C/EBP $\alpha$ -induced BMT PU.1 acquires  
495 a different conformation when it turns from a B cell to a myeloid regulator will be interesting to  
496 determine. A critical parameter for the enhancement of myeloid differentiation during the  
497 conversion of a fetal liver T cell precursor into macrophages has been described to be cell cycle  
498 length, with cell cycle extension leading to the accumulation of high PU.1 levels (Kueh et al.,  
499 2013). Whether under physiological conditions this lengthening is induced by the activation of  
500 endogenous C/EBP $\alpha$ , itself known to be a potent inhibitor of the cell cycle (Nerlov, 2007), and  
501 whether it is exacerbated by a mutation of R35 remains to be studied.

502 A transcription factor stealing mechanism has also been described for T cell differentiation.  
503 Thus, at the DN1 progenitor stage PU.1 forms a complex with Satb1 and Runx1 at GREs of  
504 PU.1-dependent genes. Once PU.1 becomes downregulated at the DN3 stage, the associated  
505 factors are released and relocate to T cell GREs where they upregulate T cell genes (Hosokawa  
506 et al., 2018). However, in contrast to the mechanism described here, where C/EBP $\alpha$  acts as the  
507 'thief' and PU.1 as the 'victim', PU.1 is the 'thief'. In another relevant example T-bet relocates  
508 Gata3 from T<sub>H</sub>2 to T<sub>H</sub>1 genes during TH1 specification (Hertweck et al., 2022). These studies  
509 support the notion that transcription factor 'stealing' could be a more general mechanism by  
510 which cells coordinate silencing of the old and activation of the new differentiation program.

511 Remarkably, C/EBP $\alpha$ <sup>R35A</sup> expression in B cells generates a myeloid cell-like state already  
512 within 1 hpi, only seen with the wild type after 18 hpi. Whether the observed catching up in gene  
513 expression after 120 h in C/EBP $\alpha$ <sup>WT</sup>- induced cells occurs gradually or in a more narrowly defined  
514 time window remains to be determined. Reflecting these observations, the capacity of C/EBP $\alpha$   
515 to induce a transition of closed to open chromatin in fibroblasts is remarkably fast compared to  
516 other pioneer transcription factors (Lerner et al., 2020). That co-expression of PU.1 further  
517 accelerates chromatin opening in fibroblasts while activating the myeloid program suggests a  
518 powerful synergism between the two pioneer factors, regulated by methylation of arginine 35.  
519 BMT completion requires 3 to 5 days for mouse cells while human cells require 5 to 7 days  
520 (Rapino et al., 2013a; Xie et al., 2004b), raising the possibility that species-specific differences  
521 in Carm1 activity play a role. However, the observation that inhibition of Carm1 accelerates BMT  
522 not only in human but also in mouse cells makes this unlikely. It will be interesting to determine  
523 whether the observed species differences of BMT length reflects a higher protein stability in the  
524 human cells, as reported for neuronal specification (Rayon et al., 2020), although other  
525 mechanisms have also been described (Ebisuya and Briscoe, 2018).

526 In line with the results described here that Carm1 inhibition biases GMPs to differentiate into  
527 macrophage colonies, HSCs lacking Carm1 have been shown to be biased towards monocyte  
528 formation (Greenblatt et al., 2018). These observations suggest that methylated C/EBP $\alpha$  is  
529 required for the decision of GMPs to become granulocytes, and that this form of the factor is not  
530 simply inactivated during macrophage specification. A role of transcription factor methylation by  
531 Carm1 has also been described for muscle differentiation. Here, asymmetric dimethylation of  
532 four arginines in Pax7 enables recruitment of the MLL complex. As a consequence, Myf5  
533 becomes transcriptionally activated, resulting in muscle cell specification (Chang et al., 2018;  
534 Kawabe et al., 2012). Carm1 has also been implicated in early embryo development and several  
535 targets have been described, including histones and chromatin modifying factors (Suresh et al.,  
536 2021; M.-E. Torres-Padilla et al., 2007), but whether this also involves the methylation of a key  
537 transcription factor is unknown.

538 Our observations challenge the notion that binary cell fate decisions simply result from the  
539 relative expression of antagonistic transcription factors (Graf and Enver, 2009a; Moris et al.,  
540 2016). Rather, post-translational modifications, such as described here, may act as an additional  
541 regulatory layer (Torcal Garcia and Graf, 2021b). Thus, the proportions of a modified versus

542 unmodified transcription factor within a precursor population could be subject to external  
543 signaling that activates Carm1 or another enzyme that induces posttranslational modifications.  
544 Such a mechanism could operate regardless of whether binary cell fate decisions occur gradually  
545 as reported for hematopoiesis (Velten et al., 2017) or abruptly as during a neuronal differentiation  
546 cascade (Konstantinides et al., 2022). How the pace of alternative cell fate decisions is regulated  
547 during cell differentiation is relevant not only for a better understanding of development but also  
548 for aberrations in developmental diseases and perhaps for the evolution of species.

549



550 **ACKNOWLEDGEMENTS**

551 We thank the T.G. laboratory members for critical discussions, the Flow Cytometry and  
552 Microscopy units of UPF-CRG for technical assistance, the CRG Genomics core facility for  
553 sequencing and Lars Velten for feedback on the manuscript. Work in the laboratory of T. G. was  
554 supported by the Spanish Ministry of Economy, Industry and Competitiveness, (Plan Estatal  
555 PID2019-109354GB-100), the CRG, AGAUR (SGR 726) and a European Research Council  
556 Synergy grant (4D-Genome). Work in the laboratory of K.S.Z. was supported by NIH  
557 (R01GM36477).

558 **AUTHOR CONTRIBUTIONS**

559 G.T.G and T.G. conceived the study and wrote the manuscript. G.T.G. performed  
560 transdifferentiation experiments (BMT and fibroblasts), cell line generation, RNA- and ATAC-seq,  
561 plasmid construction, immunofluorescence, and data analyses. E.K-L performed co-  
562 immunoprecipitation, EMSA and *in vitro* methylation assays. T.V.T. performed BMT, RNA- and  
563 ATAC-seq. A.K. and M.V-C. processed RNA-, ATAC- and CHIP-seq data. J.L. performed SMT  
564 experiments. L.A-A. performed co-immunoprecipitation, FACS, PLA and colony assays. C.B-B.  
565 performed BMT. M.P-C. confocal microscopy. R.B. and M.F. analyzed single cell expression  
566 data. S.P., K.Z., A.L. contributed ideas and discussions.

567

568

569 **SUPPLEMENTAL INFORMATION**

570

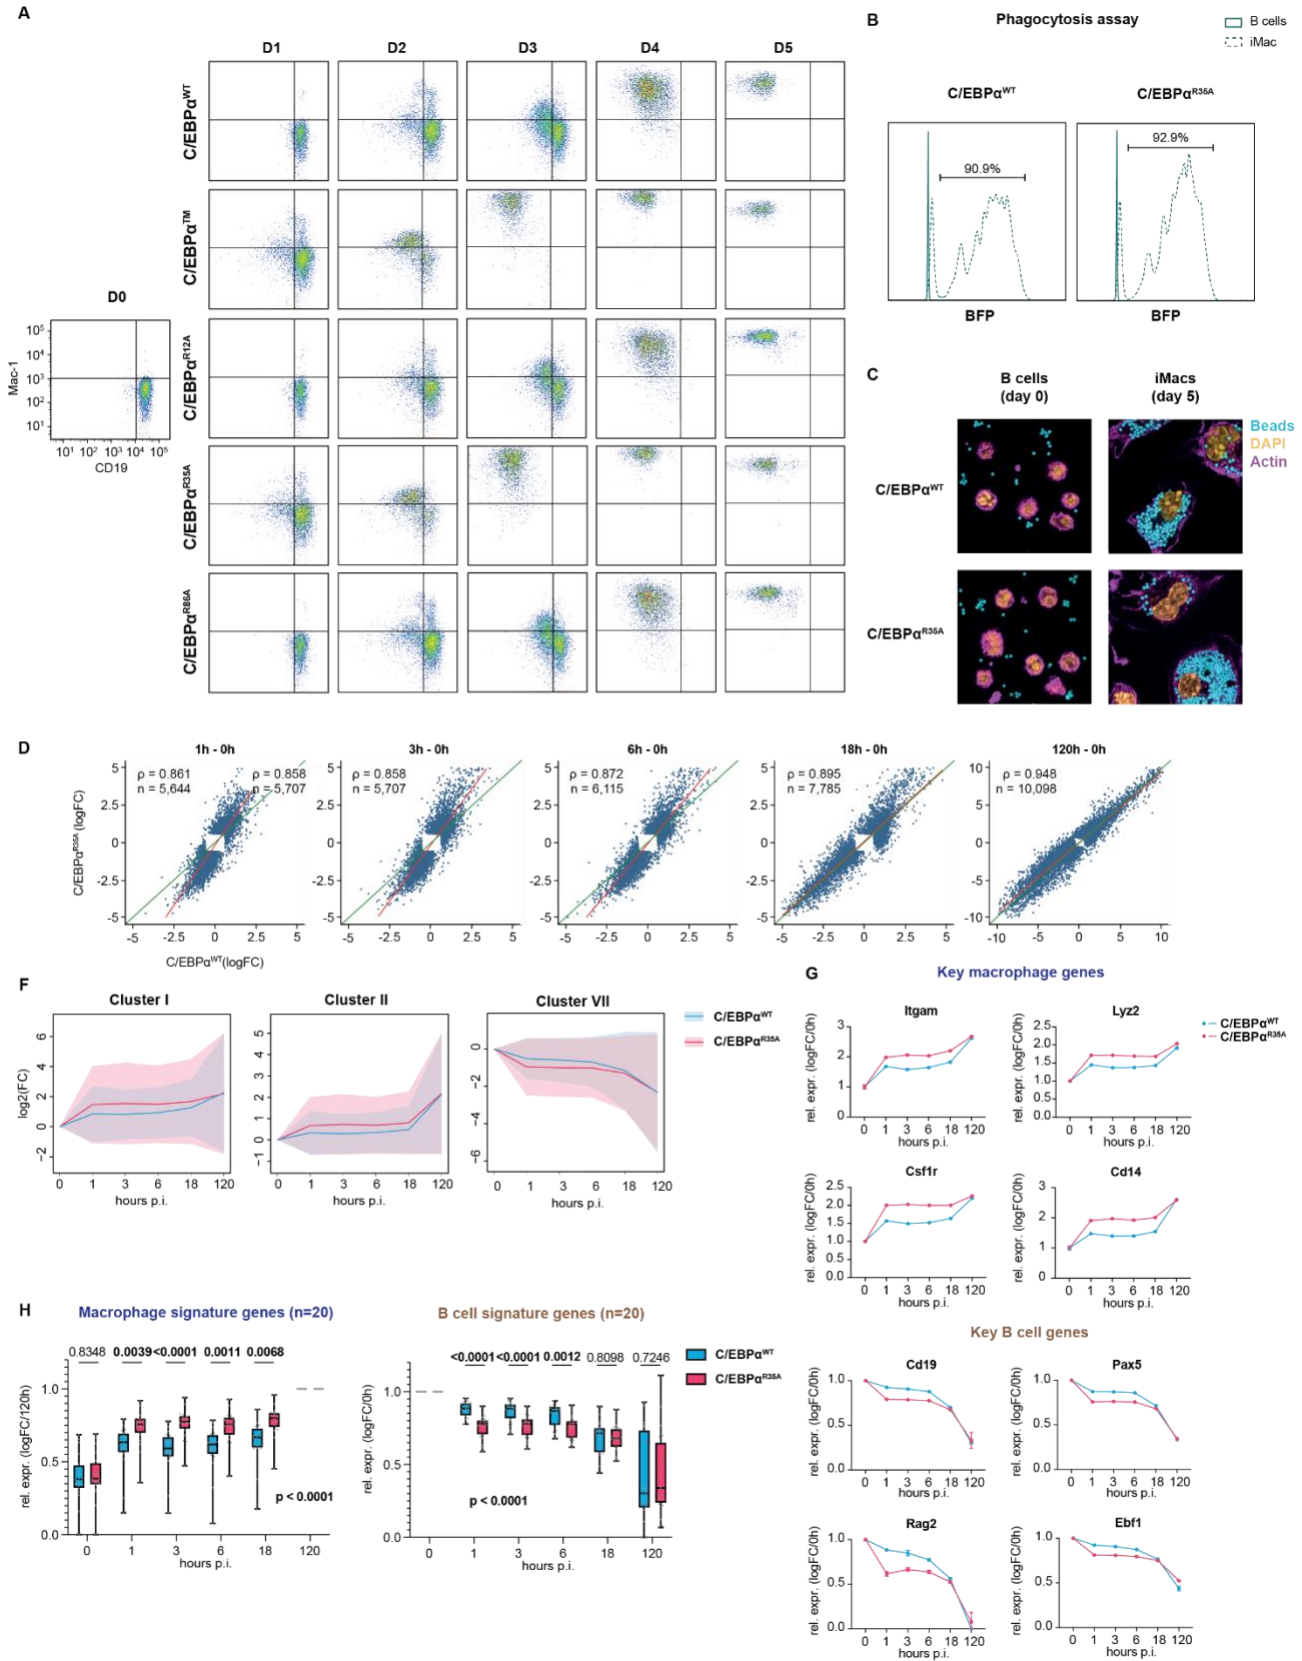

572 **Figure S1. Mutation of arginine 35 in C/EBP $\alpha$  accelerates B cell gene silencing and macrophage gene**  
573 **activation. Related to Figure 1. A.** FACS plots of Mac-1 (CD11b) and CD19 expression in B cells induced with  
574 C/EBP $\alpha^{WT}$ , C/EBP $\alpha^{TM}$ , C/EBP $\alpha^{R12A}$ , C/EBP $\alpha^{R35A}$  or C/EBP $\alpha^{R86A}$  at different days p.i. **B.** Histograms showing  
575 fluorescence intensity of internalized BFP carboxylated beads in C/EBP $\alpha^{WT}$  and C/EBP $\alpha^{R35A}$ -induced cells (dashed  
576 line) incubated overnight by flow cytometry. Data for uninduced control B cells are represented by a continuous line.  
577 Percentage of phagocytic cells is indicated. **C.** Immunofluorescent images of uninduced (day 0) and 5 days-induced  
578 pre B cells incubated overnight with BFP carboxylated beads. DNA was stained with picogreen (P7589) and F-actin  
579 with phalloidin Alexa Fluor 568. **D.** Scatter plots showing gene expression changes at 1, 3, 6, 18 and 120 hpi relative  
580 to 0h for B cells induced with either C/EBP $\alpha^{WT}$  or C/EBP $\alpha^{R35A}$ . Red line = regression line fitted to each scatter plot;  
581 green line = identity line ( $x=y$ );  $\rho$  = Spearman correlation coefficient;  $n$  = number of differentially expressed genes.  
582 **E.** Kinetics of gene expression of clusters I, II and VII of B cells induced with either C/EBP $\alpha^{WT}$  (cyan) or C/EBP $\alpha^{R35A}$   
583 (magenta) at different times p.i. The Y axis shows log<sub>2</sub> fold-changes relative to uninduced cells. The lines and the  
584 shaded backgrounds correspond to the mean  $\pm$  1.64 s.d.,  $n=1103-1868$ . **F.** RNA expression levels of key  
585 macrophage or B cell genes in B cells induced by either C/EBP $\alpha^{WT}$  (cyan) or C/EBP $\alpha^{R35A}$  (magenta) relative to 0h  
586 (mean  $\pm$  s.d.,  $n=2$ ). **G.** RNA expression levels of selected macrophage and B cell signature genes in B cells induced  
587 by either C/EBP $\alpha^{WT}$  (cyan) or C/EBP $\alpha^{R35A}$  (magenta) relative to 120h and 0h, respectively (median and quartiles are  
588 represented,  $n=20$ , statistical significance was determined using multiple paired Student's t-test for individual  
589 timepoint comparisons as well as Two-way ANOVA for overall statistical significance).

590

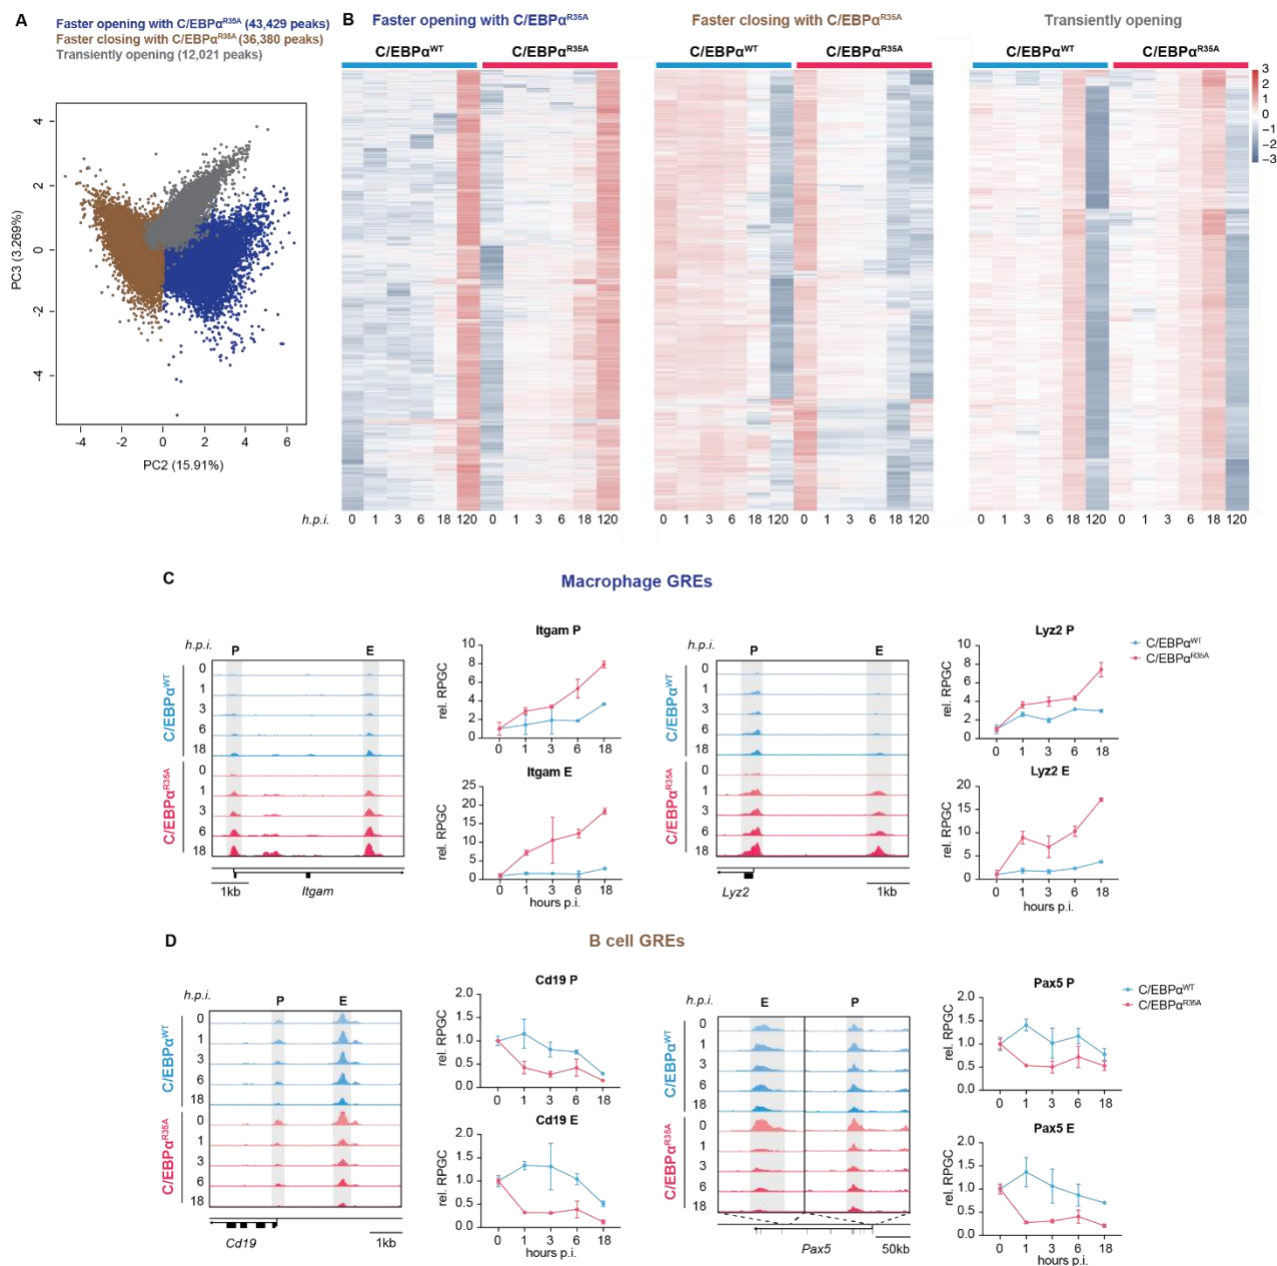

591

592 **Figure S2. C/EBP $\alpha^{R35A}$  accelerates chromatin remodeling at regulatory elements of lineage-restricted genes.**

593 **Related to Figure 2. A.** PCA analysis of individual peaks showing PC2 and PC3 and the three clusters that were

594 generated ( $n = 91,830$  peaks). **B** Three clusters were generated from a PCA analysis shown in A. The clusters show

595 three main trends: regions that are opened throughout BMT, more rapidly so with C/EBP $\alpha^{R35A}$  (blue); regions that

596 are closed throughout BMT, also more rapidly so with C/EBP $\alpha^{R35A}$  (brown); and regions that peak at 18h and are

597 closed at 120h (grey). **C.** Gene ontology (GO) enrichment of macrophage-myeloid and B cell terms of each cluster

598 from Figure 2C. Diameter of circles is proportional to the p-value. Colored circles indicate significant enrichment.

599 Chromatin accessibility kinetics of key macrophage (**D**) and B cell (**E**) gene regulatory elements (GREs). Genome

600 browser views of ATAC peaks (gray highlight; P=promoter, E=enhancer) corresponding to known or putative GREs

601 of macrophage (*Itgam* and *Lyz2*) and B cell genes (*Cd19* and *Pax5*). Genes, direction of transcription and scale are  
602 indicated in each panel. Kinetics of chromatin accessibility at different timepoints are displayed for C/EBP $\alpha$ <sup>WT</sup> (cyan)  
603 and C/EBP $\alpha$ <sup>R35A</sup> (magenta) as reads per genomic content relative to 0h (RPGC).

604

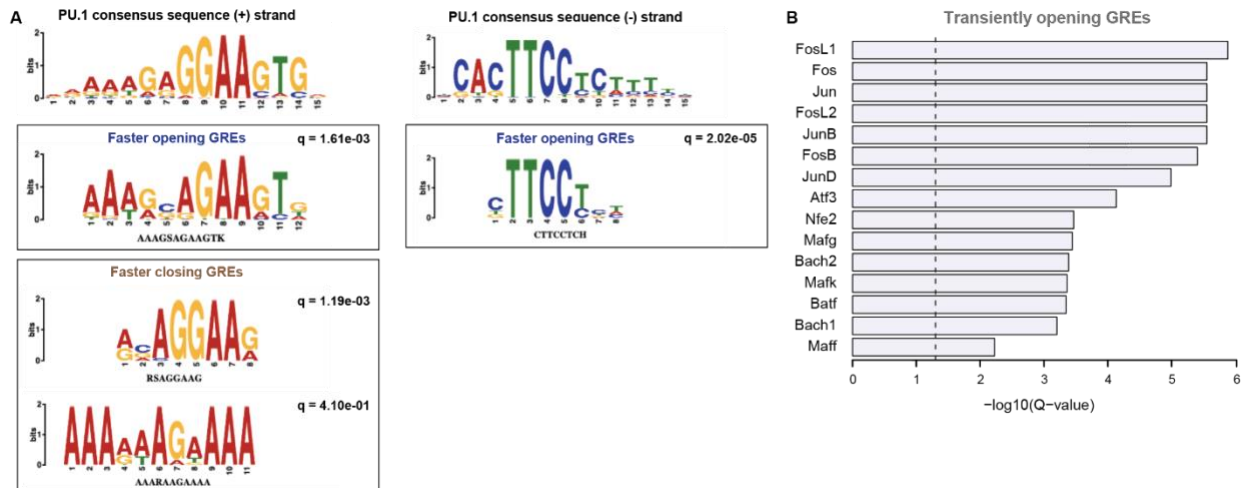

605

606

**Figure S3. C/EBP $\alpha$ <sup>R35A</sup> selectively interacts with PU.1. Related to Figure 3. A.** PU.1 enriched motifs related to Figure 3D. PU.1 consensus sequence in the + and – strand is displayed (top), as well as matched enriched de novo motifs. **B.** De novo motifs matched to known TF motifs in putative in GREs that are transiently opened (grey) obtained in Figure S2A and B. Top 20 motifs are ordered by significance.

607

608

609

610



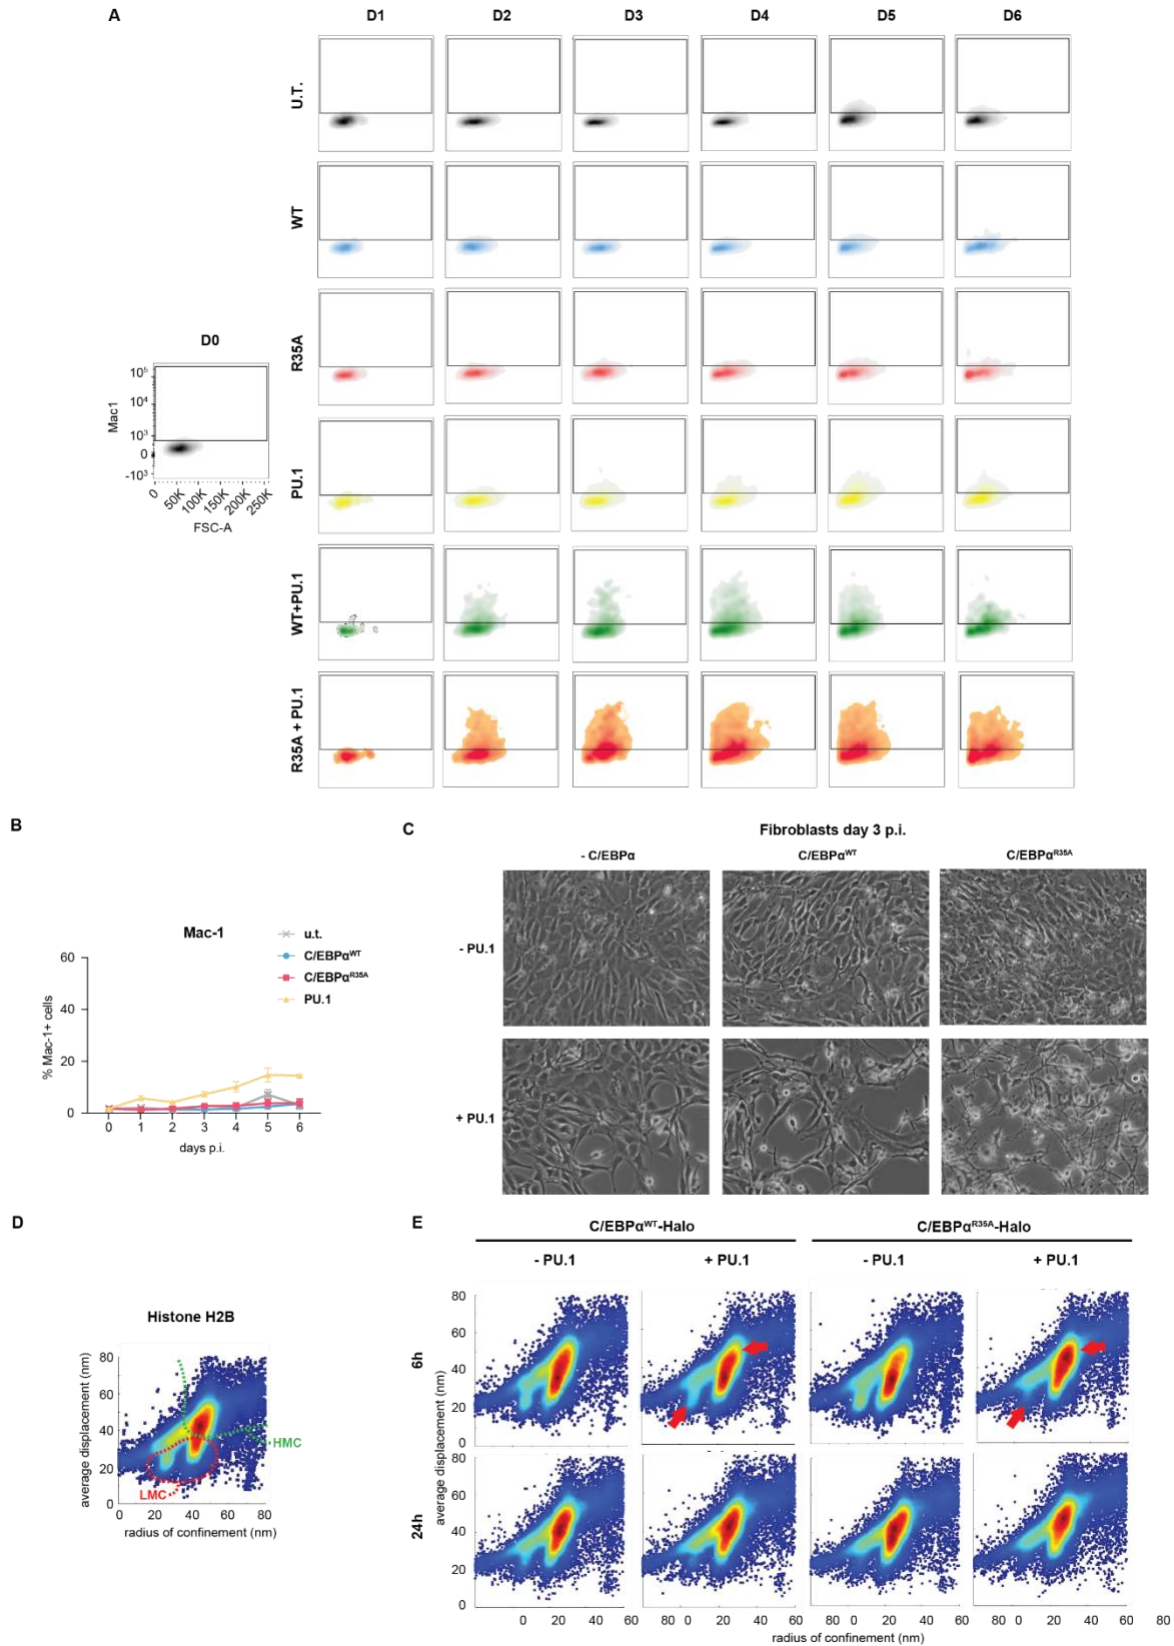

611

612 **Figure S4. C/EBP $\alpha^{R35A}$  hastens the relocation of PU.1 from B cell to myeloid GREs. Related to Figure 4. A.**

33

613 FACS plots of the fibroblast to macrophage transdifferentiation by co-expression of either C/EBP $\alpha$ <sup>WT</sup> or C/EBP $\alpha$ <sup>R35A</sup>  
614 and PU.1 measured by Mac-1 expression by flow cytometry. **B.** Kinetics of macrophage transdifferentiation induced  
615 by C/EBP $\alpha$ <sup>WT</sup>, C/EBP $\alpha$ <sup>R35A</sup> or PU.1 and untransduced cells (u.t.) measured by Mac-1 expression by FACS (mean  $\pm$   
616 s.d., n=3, statistical significance was determined using two-way ANOVA). **C.** Phase contrast images of NIH3T3 cells  
617 induced with either C/EBP $\alpha$ <sup>WT</sup> or C/EBP $\alpha$ <sup>R35A</sup> and PU.1 in different combinations for 3 days. **D.** Single molecule-  
618 tracking (SMT) of histone H2B in 3T3 cells transfected with an H2B-Halo tag construct for 24h (n = 20,000). Average  
619 displacement and radius of confinement are displayed, and chromatin mobility groups were identified (vL = very low;  
620 L = low; I = intermediate; H = high). **E.** Single molecule-tracking (SMT) of either C/EBP $\alpha$ <sup>WT</sup> or C/EBP $\alpha$ <sup>R35A</sup> in 3T3  
621 cells infected with a Dox-inducible C/EBP $\alpha$ -Halo constructs for either 6 or 24h with or without PU.1 co-expression  
622 (n = 20,000).

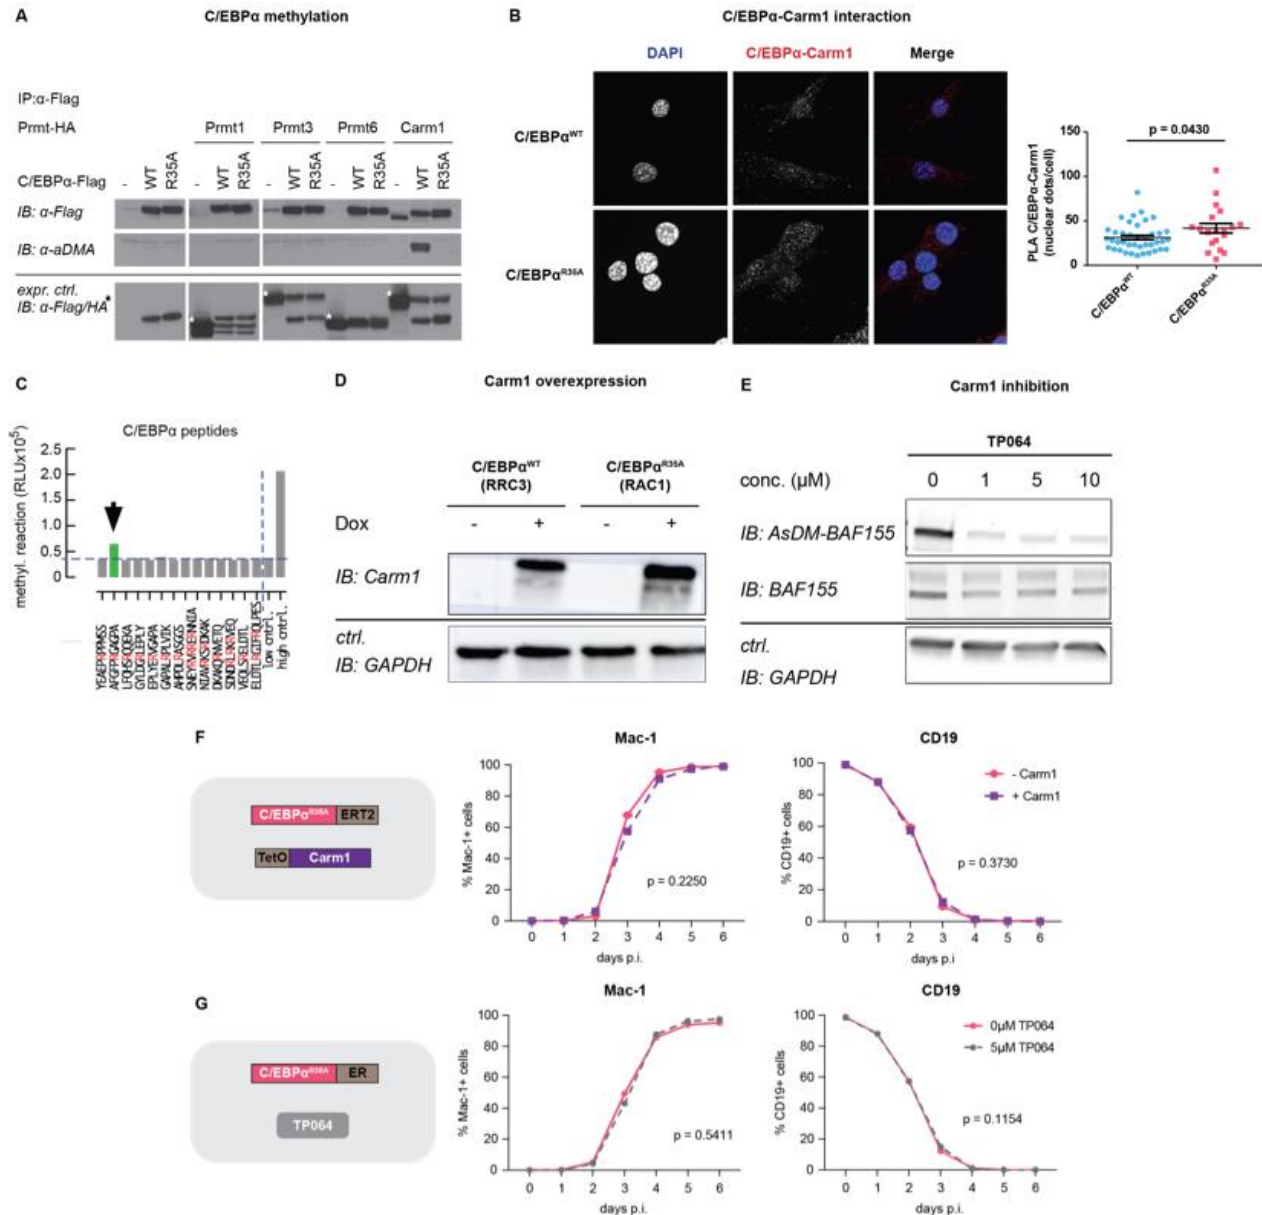

623

624 **Figure S5. Carm1-mediated methylation of arginine 35 regulates interaction between the two proteins and**

625 **the speed of C/EBP $\alpha$ -induced BMT. Related to Figure 5. A.** Immunoprecipitation of C/EBP $\alpha$ <sup>WT</sup> or C/EBP $\alpha$ <sup>R35A</sup>

626 (Flag) from HEK293-T cells co-transfected with either C/EBP $\alpha$ <sup>WT</sup>- or C/EBP $\alpha$ <sup>R35A</sup>-Flag and different type I Prmt

627 enzymes (Prmt1, Prmt3, Prmt6 and Carm1), followed by immunoblot with antibodies against asymmetrically

628 dimethylated arginine (aDMA), Flag or HA. **B.** Proximity ligation assay of Carm1 and C/EBP $\alpha$ <sup>WT</sup> or C/EBP $\alpha$ <sup>R35A</sup> in

629 fibroblast lines 3T3aER-R and 3T3aER-A, respectively, induced with  $\beta$ -estradiol for 24 hours. On the left, images of

630 the cells showing DNA stained with DAPI and interaction between C/EBP $\alpha$  and Carm1. On the right, quantification

631 of interaction by nuclear dots per cell (mean  $\pm$  s.e.; n=20-40, statistical significance was determined using an

632 unpaired Student's t-test). **C.** In vitro methylation assay using Carm1 and 13 arginine-containing peptides spanning

633 the entire C/EBP $\alpha$  protein (15 peptides, 20 R-residues highlighted in red). Peptide containing R35 bar indicated in

634 green. Low control: no enzyme; high control: optimized R-methylation peptide, provided by BPS Bioscience) **D.**  
635 Western blot of Carm1 in B cell lines RRC3 and RAC1 with or without addition of Dox. **E.** Western blot of  
636 asymmetrically dimethylated BAF155 (AsDM-BAF155) and total BAF155 (BAF155) in B cells treated with different  
637 concentrations of TP064 (1-10 $\mu$ M). **F.** Kinetics of C/EBP $\alpha$ <sup>R35A</sup>-mediated BMT upon Carm1 overexpression by pre-  
638 treatment with Dox for 24h measured by Mac-1 and CD19 expression by flow cytometry (mean  $\pm$  s.d.; n=3, statistical  
639 significance was determined using two-way ANOVA). **G.** Kinetics of C/EBP $\alpha$ <sup>R35A</sup>-mediated BMT upon Carm1  
640 inhibition by pre-treatment with TP064 for 24h measured by Mac-1 and CD19 expression by flow cytometry (mean  
641  $\pm$  s.d.; n=3, statistical significance was determined using two-way ANOVA).

642

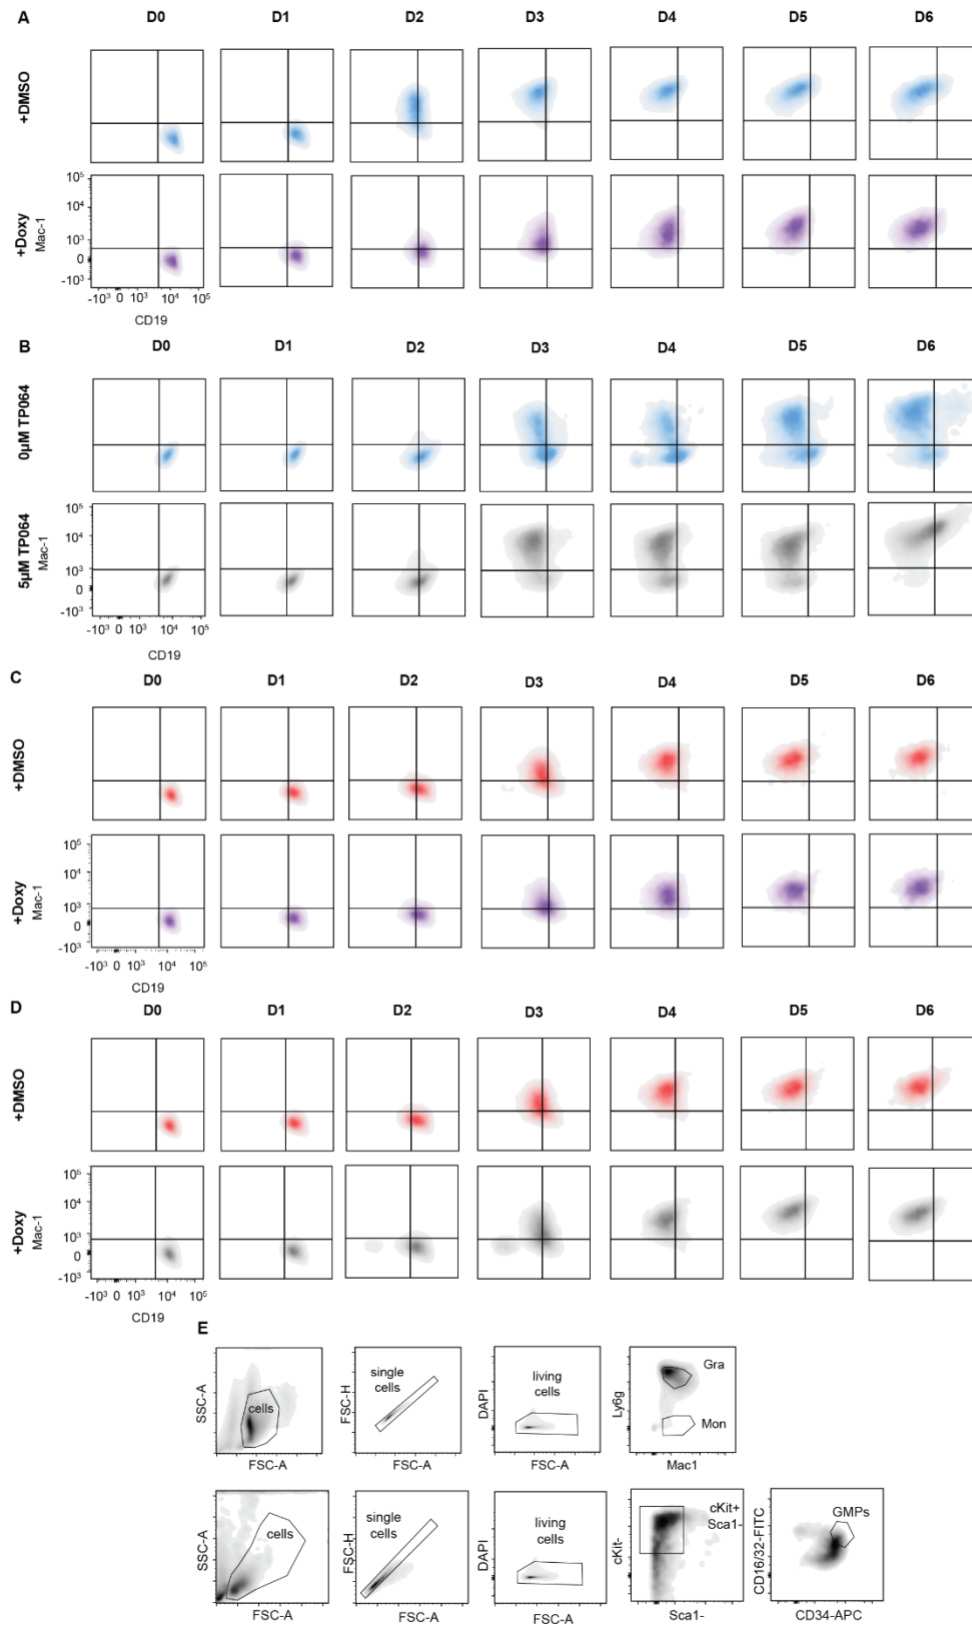

643

644

**Figure S6. Carm1-mediated methylation of arginine 35 regulates the speed of C/EBP $\alpha$ -induced BMT. Related**

645 **to Figure 5. A.** FACS plots showing BMT of cells induced with C/EBP $\alpha$ <sup>WT</sup> and exposed to Carm1 overexpression  
 646 after staining for the lineage markers Mac-1 and CD19. **B.** FACS plots showing BMT of cells induced with C/EBP $\alpha$ <sup>WT</sup>  
 647 and exposed to 5 $\mu$ M TP064 after staining for the lineage markers Mac-1 and CD19. **C.** FACS plots showing BMT of  
 648 cells induced with C/EBP $\alpha$ <sup>R35A</sup> and exposed to Carm1 overexpression after staining for the lineage markers Mac-1  
 649 and CD19. **D** FACS plots showing BMT of induced with C/EBP $\alpha$ <sup>R35A</sup> and exposed to 5 $\mu$ M TP064 after staining for  
 650 the lineage markers Mac-1 and CD19. **E.** Gating strategy for sorting of bone marrow-derived granulocytes,  
 651 monocytes (upper panels) and GMPs (lower panels).

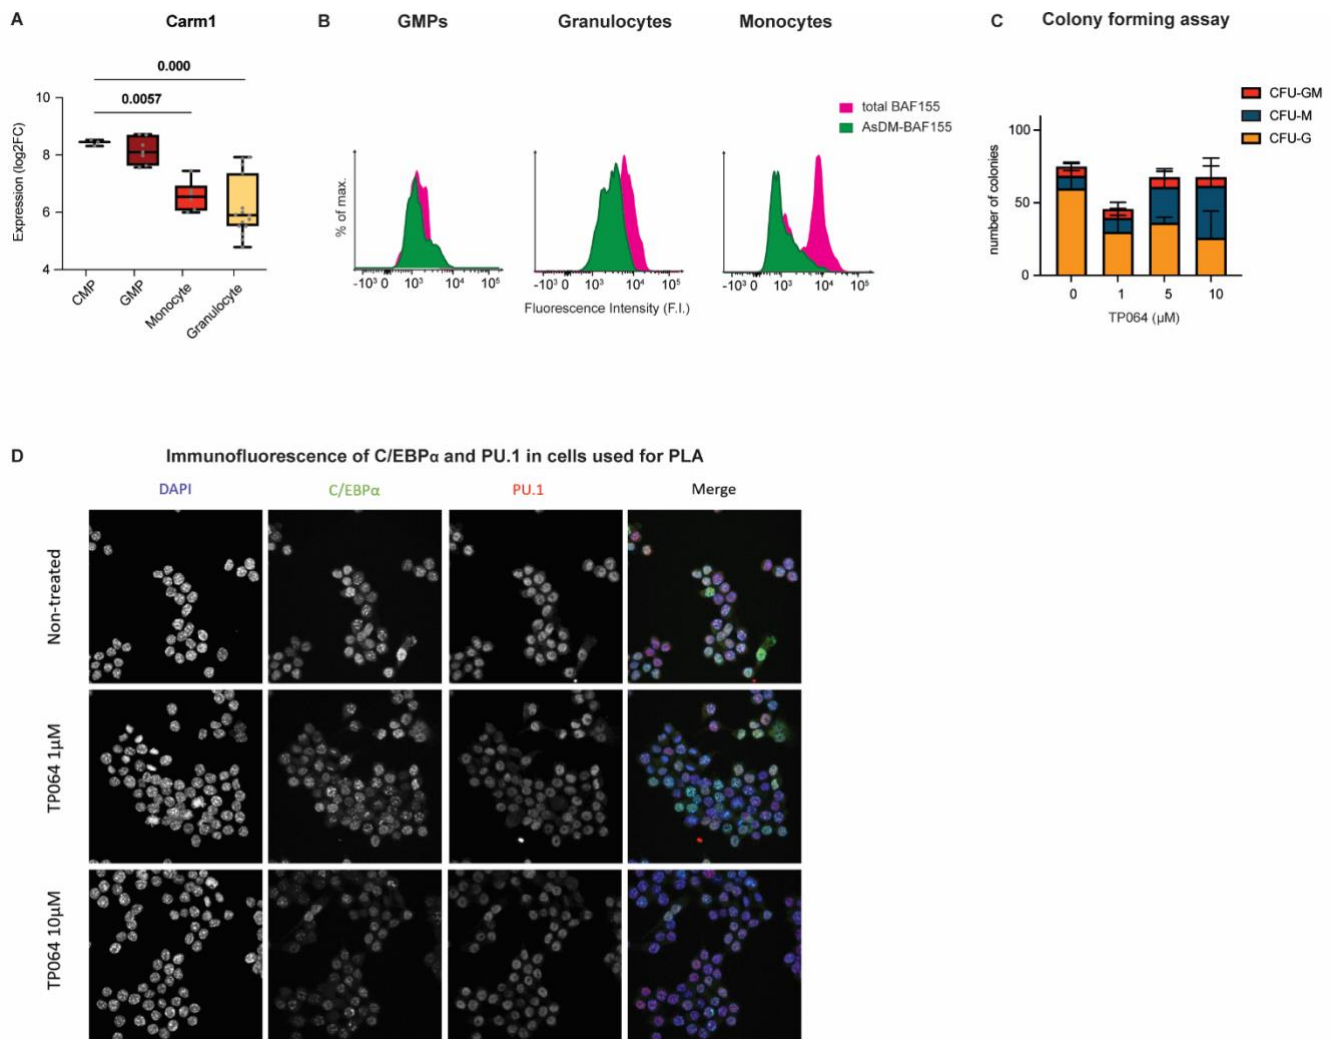

652

653 **Figure S7. Dimethylation of C/EBP $\alpha$  by Carm1 is involved in the lineage choice of hematopoietic cells and**  
 654 **C/EBP $\alpha$ :PU.1 interaction. Related to Figure 6 A.** Expression of Carm1 during myeloid differentiation obtained  
 655 from RNA-seq published data (Choi et al., 2019) (quartiles are represented, n=3-7, statistical significance was  
 656 determined using multiple unpaired Student's t-tests). **B.** FACS plots showing levels asymmetrically dimethylated  
 657 (AsDM)-BAF155 and total BAF155 in GMPs, granulocytes and monocytes. The histograms represent fluorescence  
 658 of each fraction of the protein. **C.** Colony forming unit (CFU) assay of GMPs in various concentrations of the Carm1  
 659 inhibitor TP064 after 14 days in Methocult. Total number of bipotent (CFU-GM), monocytic (CFU-M) and granulocytic

660 (CFU-G) colonies are shown (mean  $\pm$  s.d., n=3-4, statistical significance was determined using a one-way ANOVA).  
661 **D.** C/EBP $\alpha$  and PU.1 fluorescence in RAW cells used for PLA in Figure 6. DNA was stained with DAPI, C/EBP $\alpha$   
662 with AF488 and PU.1 with AF546.

663

664

## 665 **MATERIALS AND METHODS**

### 666 **Mice**

667 As a source for the B cells used in our experiments, we used C57BL/6J mice. During experiments  
668 the number of female and male mice was balanced. Mice were housed in standard cages under  
669 12h light-dark cycles and fed *ad libitum* with a standard chow diet. All experiments were approved  
670 by the Ethics Committee of the Barcelona Biomedical Research Park (PRBB) and performed  
671 according to Spanish and European legislation.

### 672 **Cells and cell cultures**

673 CD19+ B cells were isolated from the bone marrow with a monoclonal antibody to CD19 (BD  
674 Biosciences, Cat#553784) using MACS sorting technology (Miltenyi Biotech) as previously  
675 described (Di Stefano, 2016). Bone marrow-derived B cells were cultured on gelatinized plates  
676 containing S17 feeder cells in RPMI culture medium (GIBCO, Cat#12633012) containing 20%-  
677 FBS (GIBCO, Cat#10270-106), 100 U/mL Penicillin- 100 ng/mL Streptomycin (GIBCO,  
678 Cat#15140122), 2mM L-Glutamine (GIBCO, Cat#25030081) and 0.1mM 2-Mercaptoethanol  
679 (Invitrogen, Cat#31350010)(further addressed as **mouse B cell medium**), which was further  
680 supplemented with 10 ng/mL of IL-7 (Peprotech, Cat#217-17). HEK293-T, NIH3T3 cells (and  
681 derived) and MEFs were cultured in 10% FBS (GIBCO, Cat#10270-106) DMEM (GIBCO,  
682 Cat#12491015) medium. The final culture medium also contained 100U/mL Penicillin and  
683 100ng/mL Streptomycin (GIBCO, Cat#15140122), 2mM L-Glutamine (GIBCO, Cat#25030081)  
684 and 0.1mM 2-Mercaptoethanol (Invitrogen, Cat#31350010) (further addressed as DMEM  
685 complete medium). RCH-ACV (and derived) human B cells were grown in RPMI culture medium  
686 (GIBCO, Cat#22400089) containing 20%-FBS (10270-106, GIBCO) (further addressed as  
687 human B cell medium).

### 688 **Induction of mouse B cell to macrophage transdifferentiation**

689 Induction of transdifferentiation of primary pre/pro B cells (heretofore referred as B cells) isolated  
690 from the bone marrow of C57BL/6J mice was performed as previously described(Xie et al.,  
691 2004a). Briefly, B cells isolated from 8-16 weeks C57BL/6J mice were infected with C/EBP $\alpha$ -ER-  
692 hCD4 retrovirus, plated at 500 cells/cm<sup>2</sup> in gelatinized plates (12 wells) onto mitomycin-C (Sigma,  
693 Cat#M0503)-treated MEFs (10 $\mu$ g/mL mitomycin-C for 3 hours to inactivate MEFs). Cells were  
694 transdifferentiated in mouse B cell medium, which was further supplemented with 10 ng/mL each



695 of IL-7 (PeproTech, Cat#217-17), IL-3 (PeproTech, Cat#213-13), FLT-3 (PeproTech, Cat#250-31),  
696 mCSF-1 (PeproTech, Cat#315-03B), mSCF (PeproTech, Cat#250-03) and 100 nM  $\beta$ -estradiol  
697 (Merck Millipore, Cat#3301) to shuttle C/EBP $\alpha$  into the cell nucleus. Culture medium was  
698 renewed every 2 days with the same composition but without IL-7.

### 699 **Induction of fibroblast to macrophage transdifferentiation**

700 Fibroblast transdifferentiation into macrophage experiments were performed as previously  
701 described (Feng et al., 2008b). Briefly, NIH 3T3 fibroblasts were infected with C/EBP $\alpha$ -ER-IRES-  
702 hCD4 retrovirus and hCD4 positive cells were sorted and a cell line was established. Cells were  
703 plated at 200,000 cells/ml in gelatinized 6-well plates and infected with PU.1 $\Delta$ PEST-IRES-GFP  
704 retrovirus. After 24 hours cells were re-plated at 30,000 cells/ml in gelatinized 24-well plates in  
705 DMEM complete medium supplemented with IL-3 (PeproTech, Cat#213-13) mCSF-1 (PeproTech,  
706 Cat#315-03B) and 100 nM  $\beta$ -estradiol (Merck Millipore, Cat#3301) to shuttle C/EBP $\alpha$  into the  
707 nucleus.

### 708 **Induction of human B cell to macrophage transdifferentiation**

709 Transdifferentiation of human B cells from the B lymphoblastic leukemia cell line RCH-ACV was  
710 performed as previously described (Rapino et al., 2013b). Briefly, RCH-ACV cells were infected  
711 with C/EBP $\alpha$ -ER-IRES-GFP retroviruses and GFP-positive cells were sorted, and clonal lines  
712 (BLaER2 and BLaER2-A) were generated. These lines were then infected with rtTA-Puromycin  
713 retroviruses and selected with 1  $\mu$ g/mL of Puromycin for 1 week. Selected cells were further  
714 infected with pHAGE-TetO-Carm1-IRES-dTomato lentiviruses. Cells were grown in human B cell  
715 medium, supplemented with 2  $\mu$ g/mL of doxycycline (Sigma, Cat#D9891). Tomato-positive cells  
716 were sorted, and clonal cell lines were established (RRC3 and RAC1). For transdifferentiation  
717 cells were grown in human B cell medium, which was further supplemented with 10 ng/mL each  
718 of IL-3 (PeproTech, Cat#200-03), CSF-1 (PeproTech, Cat#315-03B) and 2.5  $\mu$ M 4-  
719 hydroxytamoxifen (4-OHT) (Sigma, Cat#H7904) to shuttle C/EBP $\alpha$  into the cell nucleus.

### 720 **Hematopoietic colony forming assay**

721 Bone marrow-derived GMPs from C57BL/6J mice were isolated by FACS sorting and cultured in  
722 Methocult GF M3434 (03434, Stem Cell Technologies) for 14 days. Cells were harvested from  
723 the Methocult cultures, and colonies were investigated by microscopy.

724 **Cell transfection**

725 HEKT-293T cells were transfected with C/EBP $\alpha$  WT or mutant expression vectors in the absence or  
726 presence of PRMT1-HA, PRMR3-HA, CARM1-HA, PRMT6-HA or Pu.1 as indicated using  
727 Polyethylenimine according to the manufacturer's protocol (PEI, Polysciences, Cat#24765-2)

728 **Lentivirus production and infection**

729 Lentiviruses were produced by transfecting HEK-293T cells with 6 $\mu$ g of pCMV-VSV-G, 15 $\mu$ g of  
730 pCMVDR-8.91, and 20 $\mu$ g of the lentiviral vector using the calcium phosphate transfection  
731 method. Briefly, calcium phosphate-DNA precipitates were prepared by pooling the upper  
732 amounts of the three plasmids in a 2.5M CaCl<sub>2</sub> aqueous solution. While vortexing, one volume  
733 of HBS 2X (HEPES-buffered saline solution pH=7.05, 280mM NaCl, 0.05M HEPES and 1.5mM  
734 Na<sub>2</sub>HPO<sub>4</sub>) was added dropwise to an equal volume of the calcium phosphate-DNA solution.

735 The mixture was incubated for 15 minutes at room temperature and added dropwise to HEK-  
736 293T cells grown in DMEM complete medium onto gelatin-coated 100mm dishes. After 8 hours  
737 of incubation at 37°C, the transfection medium was replaced with fresh medium and the  
738 supernatant collected after 24 hours. The medium was replaced again, and a second round of  
739 supernatant was collected after another 24 hours and mixed with the previous batch. The  
740 combined supernatants were centrifuged for 5 min at 300 rcf and filtered through 0.45 $\mu$ m  
741 strainers to remove cell debris. Lentiviral particles were then concentrated by centrifugation for  
742 2 hours at 20,000 rcf (Beckman Coulter, Optima L-100K) in round bottom polypropylene tubes  
743 (Beckman Coulter, Cat#326823). After discarding the supernatants, the lentiviral pellets obtained  
744 from one 150mm dish were thoroughly re-suspended in 80  $\mu$ L of PBS. 10<sup>6</sup> fresh cells were then  
745 collected in 900 $\mu$ L of the respective culture medium and 10 $\mu$ L of lentiviral suspension were  
746 added. Subsequently, the virus-cell mixture was centrifuged at 1,000 rcf for 2 hours at 32°C  
747 (Beckman Coulter, Allegra X- 30R). Infected cells were then cultured as described above and  
748 subsequently FACS-sorted for the establishment of clonal cell lines.

749 **Retrovirus production and infection**

750 Retrovirus constructs were generated as described before (Bussmann et al., 2009). For  
751 production of virus for mouse cells platinum E cells (Cell Biolabs, Cat#RV-101) were transfected.  
752 Platinum A cells (Cell Biolabs, Cat#RV-102) were transfected for human cells. Infection of cells  
753 was performed as previously described (Di Stefano et al., 2014).

754 **Carm1 inhibition experiments with TP064**

755 TP064 (Bio-Techne RD Systems, Bristol, UK) was used to inhibit Carm1 activity as previously  
756 described (Nakayama et al., 2018). For experiments with B cells, these were pre-incubated with  
757 5µM of TP046 24 hours prior to induction with  $\beta$ -est, and treatment with the inhibitor continued  
758 during the time of induction. For the colony forming assay with GMPs, 1-10µM of TP064 was  
759 added to the medium at the time of plating.

760 **Cell purification**

761 Mouse bone marrow cell extraction was performed as previously described (Di Stefano et al.,  
762 2014). Briefly, femurs and tibias of C57BL/6J mice were extracted and crushed on a mortar in  
763 PBS supplemented with 4%FBS and 2 mM EDTA and filtered through 0.45µm strainers (Merck  
764 Millipore, Cat#SLHV033RB). For B cells, bone marrow-derived cells were incubated with  
765 sequentially 0.1µg per 1 million cells of both Fc block and Cd19-Biotin antibody for 10 and 20  
766 minutes respectively, followed by 10 µL of magnetic streptavidin microbeads (Miltenyi, Cat#130-  
767 048-101) for an additional 20 minutes. Cd19+ cells were sorted using LS columns (Miltenyi,  
768 Cat#130-042-401). For B cell to macrophage transdifferentiation Cd19+ B cells were infected  
769 with C/EBP $\alpha$ -ER-IRES-hCD4 (WT and mutants) and cultured over MEF feeder cells for 4 days.  
770 Cultured B cells were incubated sequentially with 0.1µg per 1 million cells of both Fc block and  
771 hCD4-Biotin antibody for 10 and 20 minutes respectively, followed by 10 µL of magnetic  
772 streptavidin microbeads (Miltenyi, Cat#130-048-101) for an additional 20 minutes. hCD4+ cells  
773 were enriched with LS columns (Miltenyi, Cat#130-042-401).

774 For granulocytes and monocytes, bone marrow-derived cells were incubated sequentially  
775 with 0.1µg per 1 million cells of both Fc block and Mac1-Biotin antibody for 10 and 20 minutes  
776 respectively, followed by 10 µL of magnetic streptavidin beads (Miltenyi, Cat#130-048-101) for  
777 an additional 20 minutes. Mac1+ cells were sorted using LS columns (Miltenyi, Cat#130-042-  
778 401) and incubated with Mac1-PE and Ly6g-APC for 20 minutes. Mac1+ Ly6g- (monocytes) and  
779 Mac1+ Ly6g+ cells (granulocytes) were sorted using either FACS Aria or Influx cell sorters.

780 For granulocyte-monocyte progenitors (GMPs), bone marrow-derived cells were lineage-  
781 depleted using a Lineage Cell Depletion Kit (Miltenyi, Cat#130-090-858). Lineage negative cells  
782 were then incubated with Cd34-APC, cKit-APC-Cy7, Sca1-PE-Cy7 and Cd16/32-FITC for 1.5  
783 hours. Sca1- cKit+ Cd34+ Cd16/32+ cells (GMPs) were sorted using either FACS Aria or Influx  
784 cell sorters.

785 For 3T3 NIH fibroblasts cells infected with C/EBP $\alpha$ -ER-IRES-hCD4 (WT and T35A) were  
786 incubated with 0.1 $\mu$ g per 1 million cells of both Fc block and hCD4-Biotin antibody (BD  
787 Pharmingen, Cat#555347) for 10 and 20 minutes respectively, followed by 10  $\mu$ L of magnetic  
788 streptavidin beads (Miltenyi, Cat#130-048-101) for an additional 20 minutes. hCD4+ cells were  
789 purified using LS columns (Miltenyi, Cat#130-042-401).

790 For B lymphoblastic leukemia cells (RCH-ACV) cells stably infected with C/EBP $\alpha$ -ERT2-  
791 IRES-GFP, rtTA-Puro and TetO-Carm1-IRES-TdTomato were induced with 1 $\mu$ g/ml of  
792 doxycycline (Sigma-Aldrich, Cat#D9891). GFP+ and TdTomato+ cells were single cell-sorted  
793 using either FACS Aria or Influx cell sorters.

794 In co-cultures between B cells and feeder cells, non-adherent cells were collected, and joined  
795 with trypsinized adherent cells centrifuged at 300 RCF for 5 minutes. Cells were re-suspended  
796 in 100  $\mu$ L PBS containing 1  $\mu$ g/mL of mouse Fc block for 10 minutes. Conjugated primary  
797 antibodies were added to the blocking solution and cells were further incubated at 4°C in the  
798 dark for 20 minutes. Cells were washed with additional 1mL of PBS and centrifuged at 300 rcf  
799 for 5 minutes. The supernatant was discarded and cells were re-suspended in 500  $\mu$ L of PBS  
800 containing 5  $\mu$ g/mL of DAPI. Samples were processed in a FACS analyzer (LSR II, BD; Fortessa,  
801 BD) with DiVa software and data analyzed using FlowJo software.

802 Antibodies used for cell sorting and flow cytometry are listed in **Table S1**.

### 803 **Phagocytosis assay**

804 After B cell to macrophage transdifferentiation, cells were removed from feeder cells through  
805 differential adherence to tissue culture dishes for 40 minutes. Around 200,000 of the resulting B  
806 cells (or induced macrophages) were plated in each well of a 24-well plate containing 0.01%  
807 poly-L-lysine-treated coverslips (Corning, Cat#354085) in 10% FBS-DMEM supplemented with  
808 IL-3 (Peprotech, Cat#213-13), mCSF-1 (Peprotech, Cat#315-03B) and cultured at 37°C  
809 overnight in the presence of 1:1000 diluted blue fluorescent carboxylated microspheres  
810 (Fluoresbrite, Cat#17458-10). Cells were centrifuged at 1000 RCF for 5 minutes to improve  
811 attachment to the coverslips. The supernatant was removed and the cells were washed once  
812 with PBS.

813 For fixation, 4% PFA was added to the wells for 20 minutes, cells were washed twice with  
814 PBS and cell membranes permeabilized with 0.1% Triton X-100 PBS (0.1% PBST) for 15

815 minutes at room temperature. Cells were blocked using 0.1% PBST with 3% Bovine Serum  
816 Albumin (BSA) for 30-45 minutes. Cells were washed twice in PBS. Actin filaments were  
817 subsequently stained with 1:100 diluted red phalloidin (Alexa Fluor 568, Thermo Fisher Scientific,  
818 Cat#A12380) while DNA was stained with a 1:500 diluted yellow probe (Quant-iT PicoGreen  
819 dsDNA Assay Kit, Thermo Fischer Scientific, Cat#P7589). Cells were incubated with the two  
820 dyes in 0.1% PBST containing 1% BSA at room temperature for 1 hour in the dark and washed  
821 twice with PBS afterwards. Coverslips carrying the attached cells in the well were then recovered  
822 with tweezers and mounted upside-down onto a charged glass slide containing a 14  $\mu$ L drop of  
823 mounting medium (7 $\mu$ L Dako + 7 $\mu$ L 0.1% PBST). Coverslips were sealed with nail polish and  
824 imaged in a Leica TCS SPE inverted confocal microscope.

825       Antibodies used for immunofluorescence and intracellular staining for flow cytometry are  
826 listed in **Table S2**.

### 827 **Proximity ligation assay (PLA)**

828 Proximity ligation assay was performed using Duolink Orange Kit (Sigma-Aldrich,  
829 Cat#DUO92007). Briefly, after sorting or culturing desired cell populations, 8.000 – 100.000 cells  
830 per well were seeded into 24-well plates containing 0.01% poly-L-lysine (Sigma) treated  
831 coverslips in appropriate medium, centrifuged at 1000 x g for 5 minutes and fixed with 4% PFA  
832 for 15 minutes. Subsequent steps were performed according to the kit's protocol with antibody  
833 concentrations identical to those used for immunofluorescence. Coverslips were mounted using  
834 Fluoroshield mounting medium with DAPI (Abcam, Cat#ab104139) and imaged in a Leica TCS  
835 SPE confocal microscope.

### 836 **Intracellular staining for flow cytometry**

837 After antibody staining of cell surface markers, cells were fixed in 4% BSA for 10 minutes at room  
838 temperature in a rotating wheel. Fixation was stopped with two washes in PBS. Cells were  
839 permeabilized in 0.1% PBST at room temperature in a rotating wheel for 10 minutes. Cells were  
840 blocked using 0.1% PBST with 3% Bovine Serum Albumin (BSA) for 30-45 minutes. Cells were  
841 washed twice in PBS. Cells were incubated with primary antibodies and secondary antibodies  
842 diluted at the stated concentrations in 0.1% PBST with 1% BSA for 2 and 1 hours, respectively,  
843 with two washes in PBS in between and after. Cells were resuspended in PBS and processed in

844 a FACS analyzer (LSR II, BD; Fortessa, BD) with DiVa software and data analyzed using FlowJo  
845 software.

846 Antibodies used for immunofluorescence and intracellular staining for flow cytometry are  
847 listed in **Table S2**.

### 848 **Protein extraction, immunoprecipitation and Western blotting**

849 Preparation of whole cell lysates and immunoprecipitation of WT or mutant C/EBP $\alpha$  proteins  
850 were performed as previously described (Kowenz-Leutz et al., 2010). Briefly, cells were lysed  
851 (20 mM HEPES pH 7.8, 150 mM NaCl, 1 mM EDTA pH 8, 10 mM MgCl<sub>2</sub>, 0,1% Triton X-100,  
852 10% Glycerol, protease inhibitor cocktail (Merck), 1mM DTT, 1mM PEFA bloc (Böhringer).  
853 Immunoprecipitation was performed with appropriate antibodies as indicated for 2 h at 4°C.  
854 Immunoprecipitated proteins were collected on Protein A Dynabeads (Invitrogen, Cat#100001D)  
855 or Protein-G Dynabeads (Invitrogen, Cat#10004D), separated by SDS-PAGE (Mini PROTEAN  
856 TGX, 4-15%, Bio-RAD #5671084). For Western blotting, samples were loaded in 10% Mini-  
857 PROTEAN TGX gels (Bio- Rad) and resolved by electrophoresis in running buffer (**Table S3**).  
858 Protein samples were transferred to a methanol pre-activated PVDF membrane (Bio-Rad,  
859 Cat#1620177, Bio-Rad) by running them in transfer buffer (TBS) (**Table S3**) for 1 hour at 300mA  
860 and 4°C. Membranes were rinsed in milliQ water and protein transfer was checked by Ponceau  
861 staining (Sigma). Transferred membranes were washed once with TBS and three times with  
862 TBS- Tween (TBST) (**Table S3**) followed by 5% milk in TBST for 45 min. Membranes were then  
863 incubated with primary antibodies (**Table S4**) in 5% milk TBST, rotating overnight at 4°C, then  
864 washed three times with TBST followed by incubation with the secondary antibodies conjugated  
865 to horseradish peroxidase in 5% milk TBST for 1 hour. After three TBST washes, proteins were  
866 detected using enhanced chemiluminescence reagents (Amersham ECL Prime Western Blotting  
867 detection) in an Amersham Imager 600 analyzer or visualized by ECL (GE Healthcare, UK)..  
868 Quantification of band intensity from scanned blots was performed with Fiji software.

### 869 **Electrophoretic mobility shift assay**

870 Nuclear extracts were prepared from transfected HEKT cells by a mininuclear extract protocol  
871 (Schreiber et al., 1989). Electrophoretic mobility shift assays (EMSA) was performed as  
872 previously described (Kowenz-Leutz et al., 1994) using double stranded IRDye Oligonucleotides  
873 containing a C/EBP-binding site: IRD800-GACACTGGATTGCGCAATAGGCTC and IRD800-

874 GAGCCTATTGCGCAATCCAGTGTC (Metabion). Briefly, binding reactions with nuclear extracts  
875 (2,5µg) and double stranded IRD800 oligos (20pmol) were incubated for 15 min on ice, orange  
876 loading dye (Li-Cor, Cat# P/N 927-10100) was added and protein-DNA complexes were  
877 separated on a 5% native polyacrylamide gel in 0,5x TBE at 25mA at room temperature. EMSA  
878 results were visualized and quantified (Odyssey scanner, Licor, channel 800nm).

### 879 ***In vitro* protein methylation assay**

880 Methylation of peptides (PSL, Heidelberg, Germany, **Table S5**) was performed using the  
881 bioluminescence-based MTase-Glo™ Assay (Promega, Cat#V7601) according to the  
882 manufacturer's protocol. Assay conditions: 200 ng of enzyme was incubated with 5µM Peptide,  
883 10 µM S-adenosyl-L-(methyl)-methionine as methyl donor (SAM) and 6x Methyltransferase-Glo  
884 reagent at 23°C for 60 minutes. S-adenosylhomocystein (SAH) generated during the reaction  
885 was converted to ADP as a proportional reaction product dependent of substrate methylation by  
886 the enzymes. Subsequent incubation with the Methyltransferase-Glo Detection Solution at 23°C  
887 for 30 minutes converts ADP to ATP that is used in a luciferase/luciferin-based reaction and  
888 determined as relative light units (RLU) in a Berthold luminometer (Hsiao et al., 2016).

### 889 **RNA sequencing**

890 RNA was extracted with a miRNeasy mini kit (217004, Qiagen), quantified with a NanoDrop  
891 spectrophotometer and its quality examined in a fragment Bioanalyzer (Aligent 2100 Bioanalyzer  
892 DNA 7500 assay). cDNA was synthesized with a High-Capacity RNA-to-cDNA kit (4387406,  
893 Applied Biosystems). For RNA-sequencing (RNA-seq), libraries were prepared with a TruSeq  
894 Stranded mRNA Library Preparation Kit (Illumina) followed by single-end sequencing (50 bp) on  
895 a HiSeq2500 instrument (Illumina), obtaining at least 40 million reads per sample.

896 Quality control of FASTQ reads was performed using FastQC version v.0.11.3. Reads  
897 were mapped aligned to the mm10 genome using STAR version 2.5.0a (Dobin et al., 2013).  
898 Gene counts were quantified Gene expression was quantified using STAR (--quantMode  
899 GeneCounts). Normalized counts and differential gene expression analysis was carried out using  
900 DESeq2 version 1.14.1 (Love et al., 2014). For each transdifferentiation experiment, timepoint  
901 0h was set as a reference point and any gene that exhibited a statistically significant change in  
902 expression ( $\log_2FC \geq 0.5849625$  and  $p\text{-value} \leq 0.05$ ) at a later timepoint was isolated. For PCA,  
903  $\log_2$  DESeq2 normalized counts of differentially expressed genes averaged across replicates

904 were used. The R `prcomp()` command with `scale=T` was used. Pheatmap version 1.0.12 was  
905 used to visualize changes in gene expression for all the isolated differentially expressed genes  
906 with the following clustering options: `clustering_distance_rows="correlation"`,  
907 `clustering_method="ward.D2"`, `scale="row"`.

#### 908 *Scatter plots*

909 Differentially expressed genes (DEGs) were determined for each timepoint as described in  
910 the "Materials and Methods". The union of identified DEGs in the WT and R35A systems per  
911 timepoint were used to generate scatterplots depicting the  $\log_2FC$  changes of the  
912 aforementioned genes for each transdifferentiation system. A regression line, colored in red, was  
913 fit for each scatterplot using the `geom_smooth(method=lm)` R command. The identity line ( $y=x$   
914 line) is depicted in green. The spearman correlation coefficient (`cor(method="spearman")`  
915 function in R) and the number of DEGs are also depicted per scatterplot.

#### 916 **Gene ontology analysis**

917 Functional analyses by GO were performed with the R package "g:profiler2" version 0.2.0  
918 (Raudvere et al., 2019). Balloonplots depict all pathways associated with a specific keyword that  
919 were found enriched in at least 1 cluster. Metaplots for each cluster depict the average  $\log_2FC$   
920 values of genes per timepoint and per cluster. Shaded background corresponds to the mean  
921 values  $\pm 1.644854$  standard deviation. Gene expression analysis of signature genes was  
922 performed using the individual values of genes listed in **Table S6** and normalized to timepoints  
923 0h for B cell genes and 120h for macrophage genes.

#### 924 **Chromatin accessibility by ATAC-seq**

925 ATAC-seq was performed as published (Buenrostro et al., 2015). Briefly, cells were harvested  
926 at the mentioned timepoints, feeder-depleted and lysed and 50.000 cells used per condition.  
927 Immediately, transposition was performed using Nextera Tn5 Transposase (15027865, Illumina)  
928 at 37°C for 30 minutes. Chromatin was then purified using Qiagen MinElute PCR Purification Kit  
929 (28004, Qiagen). DNA was then amplified using NEBNext High Fidelity PCR Master Mix  
930 (M0541S, New England Biolabs Inc.) and barcoded primers (see table MMX). qPCR was  
931 performed to determine the optimal number of cycles for each condition to stop amplification prior  
932 to saturation. Quality was analyzed by gel electrophoresis and in a fragment Bioanalyzer (Agilent  
933 2100 Bioanalyzer DNA 7500 assay).



934 Read quality was assessed with FastQC version v.0.11.3. Adaptors were removed using  
935 Cutadapt (version 0.4.2\_dev) TrimGalore! In paired end mode (--paired --nextera)(Martin,  
936 2011). Reads were aligned to the mm10 genome using bowtie2 (v 2.2.4) in paired end mode with  
937 standard parameters. Output SAM files were converted to BAM files using samtools (v 0.1.19)  
938 (Li et al., 2009). BAM files were sorted and indexed using the samtools commands sort and index,  
939 respectively. Low quality reads and reads associated with a not primary or supplementary  
940 alignment SAM flag were filtered out using the samtools command "samtools view -F 2304 -b -q  
941 10". PCR duplicates were removed with Picard MarkDuplicates (version 2.3.0) with the following  
942 options: "REMOVE\_DUPLICATES=true ASSUME\_SORTED=true VERBOSITY=WARNING".

943 Filtered BAM files were indexed with samtools index and were used as input in the  
944 bamCoverage command of deeptools (v3.0.1)(Ramírez et al., 2014) in order to generate bigwig  
945 files. bamCoverage was used with the options --binSize 1 --normalizeUsing RPGC --  
946 effectiveGenomeSize 2150570000 --extendReads --outFileFormat bigwig. In order to call peaks,  
947 bam files of each timepoint and experiment were merged using the samtools merge command.  
948 Resulting merged bam files were indexed, and peaks were called using MACS2 with the options  
949 -f BAMPE --nolambda --nomodel -g mm -q 0.05.

## 950 **Determination of differentially accessible ATAC peaks**

951 In order to pinpoint regions of interest, peaks of all timepoints and all experiments were merged  
952 using the bedtools suite command bedtools merge. Read counts falling within the merged peak  
953 regions were calculated using the Rsubread package and the featurecounts command with the  
954 options isPairedEnd=T, strandSpecific=0, useMetaFeatures=F. For each transdifferentiation  
955 experiment, DESeq2 was used in order to compare all timepoints with timepoint 0h. Any peak  
956 showing a  $\log_{2}FC \geq 1$  & Adjusted p-value  $\leq 0.05$  & average counts across timepoints  $\geq 5$  was  
957 termed as a differentially accessible region and was kept for further analyses. The total number  
958 of peaks isolated was 91830. Variance stabilized counts were calculated for the isolated regions  
959 using the DESeq2 command varianceStabilizingTransformation and the options "blind=T",  
960 fitType="parametric". Variance stabilized counts were averaged across timepoint replicates by  
961 raising them at the power of 2, extracting their average and log2 transforming the resulting mean.  
962 PCA was applied to this dataset using the R prcomp command, with "scale=T".

963 To group peaks, PCA was initially applied and PC1 and PC2 values for the 91,830 regions  
964 were used in order to arbitrary cluster peaks into 3 groups depending on the sign of their PC1  
965 and PC2 values. Values for each of the 3 groups were visualized using the pheatmap package.  
966 Visual examination of the 3 main groups showed different trends: Peaks whose accessibility is  
967 higher at 120h (43429 peaks), is lower at 120h (36380 peaks) and is higher at 18h (12021 peaks).

## 968 **Motif analysis**

969 Peaks from the 3 different groups were centered and extended 50bp upstream and downstream.  
970 Nucleotide sequences for each centered peak were extracted using bedtools getfasta.  
971 Sequences were submitted into MEME-ChIP with the following parameters: -dna -seed 49 -  
972 meme-nmotifs 20 -meme-minw 5 -meme-minsites 2 -meme-minw 4 -meme-maxw 12. TOMTOM  
973 was run using the output meme.txt file in order to identify matches of known transcription factor  
974 motifs to the *de novo* discovered motifs. For each TOMTOM output a series of additional filtering  
975 steps were undertaken:

- 976 1. *De novo* motif sequences need to have  $\leq 75\%$  rate for each nucleotide (filtering out  
977 repetitive motifs).
- 978 2. TOMTOM q-values have to be  $\leq 0.01$ .
- 979 3. The matched transcription factor has to be expressed at least at one timepoint.

## 980 **Promoter accessibility analysis**

981 Genomic coordinates of mm10 genes were downloaded from the UCSC table browser (RefSeq  
982 genes). A single promoter region was assigned to each gene. The region consisted of 1kb  
983 upstream and downstream of the transcription start site of the largest transcript of each gene.  
984 Counts for each timepoint and each transdifferentiation experiment were assigned to each  
985 promoter as described above. DESeq2 was used in order to identify differentially accessible  
986 promoters as described above with the following differences regarding the cutoffs used:  
987  $\text{FoldChange} \geq 1.5$  &  $p\text{-value} \leq 0.05$ . Variance stabilized counts were extracted for each  
988 differentially accessible promoter, a mean value per replicate was extracted and the values were  
989 plotted using pheatmap. Promoters were then grouped into 8 clusters. Balloonplots depict all  
990 pathways associated with a specific keyword that were found enriched in at least 1 cluster.

991 For each promoter cluster and each promoter, log<sub>2</sub>FC changes were extracted by comparing  
992 expression levels (DESeq2 normalized counts) of every timepoint with the corresponding  
993 timepoint 0h of the experiment.

#### 994 **Virtual ChIP**

995 C/EBP $\alpha$  and PU.1 binding profiles from ChIP-seq experiments in mouse B cell to macrophage  
996 transdifferentiation system were retrieved from earlier work (Van Oevelen et al., 2015). C/EBP $\alpha$   
997 and PU.1 peaks from timepoints 0h, 3h, 12h and 24h were pooled and merged using the bedtools  
998 merge command. Each peak was assigned a unique identifier corresponding to the timepoints  
999 and experiments the peak was “present”. 6 different groups of peaks were extracted from the  
1000 pooled file:

1001 1, 2 and 3.\_Peaks bound by PU.1 at 0h but not at 24h. Group was split further into two sub-  
1002 groups depending on whether C/EBP $\alpha$  was found to bind at any timepoint.

1003 4, 5 and 6.\_Peaks bound by C/EBP $\alpha$  at 24h but not at 0h. Group was split further into two  
1004 sub-groups depending on whether PU.1 was found to bind at any timepoint.

1005 Three different kinds of plots were used to summarize the accessibility dynamics of the six  
1006 group of peaks in our transdifferentiation system. For each peak the average ATAC-seq bigwig  
1007 score was calculated using deeptools multiBigwigSummary. Any peak overlapping with mm10  
1008 encode blacklisted regions was excluded. Values were averaged across timepoint replicates and  
1009 visualized in R using the pheatmap package. The same values used for the heatmap peak values  
1010 were used. Z-transformed values were calculated for every peak.

#### 1011 **Single molecule tracking (SMT)**

1012 30,000 NIH 3T3 cells inducible for CEBPAwt-HALO or CEBPAr35a-HALO were seeded in a  
1013 LabTek-II chambered 8 well plates (Lab-Tek 155049), and induced for 6h or 24h with 1ug/ml  
1014 doxycycline, with or without prior infection with TETO-FUW-PU.1 lentivirus infection. Right before  
1015 imaging, cells were treated with 5nM of Janelia Fluor 549 (JF549) HaloTag ligand (a kind gift  
1016 from Luke Lavis, HHMI) for 15 minutes. Cells were subsequently washed three times in PBS at  
1017 37C, and Phenol Red-free High Glucose medium was added to each well. All imaging was  
1018 carried out under HILO conditions (Tokunaga et al., 2008). For imaging experiments, one frame  
1019 was acquired with 100ms of exposure time (10 Hz) to measure the intensity of fluorescence of

1020 the nuclei, and in SMT)experiments, 5000 frames were acquired with an exposure of 10ms (100  
1021 Hz).

1022 Imaging experiments were carried out in Phenol red-free High Glucose Medium  
1023 (ThermoFisher, Cat#21063029) pyruvate, GlutaMAX, in an imaging chamber heated at 37°C  
1024 (more details in the Single Molecule Live Cell Imaging section). All live-cell imaging experiments  
1025 of SMT were carried out in a Nanoimager S from Oxford Nanoimaging Limited (ONI), in a  
1026 temperature and humidity-controlled chamber, a scientific Complementary metal–oxide–  
1027 semiconductor (sCMOS) camera with a 2.3 electrons rms read noise at standard scan, a 100X,  
1028 1.49 NA oil immersion objective and a 561 nm green laser. Images were acquired with the  
1029 Nanoimager software. Quantification and Statistical Analysis of SMT was performed as  
1030 previously described (Lerner et al., 2020). All scripts are publicly available.

### 1031 **Two Parameter SMT Tracking Analysis**

1032 In brief, TIF stacks SMT movies were analyzed using MATLAB-based SLIMfast script (Teves et  
1033 al., 2016) a modified version of MTT (Sergé et al., 2008), with a Maximal expected Diffusion  
1034 Coefficient (DMax) of 3  $\mu\text{m}^2/\text{s}$ . The SLIMfast output .txt files were reorganized by the  
1035 homemade csv\_converter.m MATLAB script (available in (Lerner et al., 2020) in .csv format for  
1036 further analysis. The single molecule tracking .csv files (see previous section) were first classified  
1037 by the homemade SMT\_Motion\_Classifier.m MATLAB script. Single molecule trajectories (or  
1038 tracks) with a track duration shorter than 5 frames were discarded from the analysis. Motion  
1039 tracks are classified by the script in different groups: tracks with  $\alpha \leq 0.7$  were considered as  
1040 Confined; motion tracks with  $0.7 < \alpha < 1$  as Brownian; and motion tracks with  $\alpha \geq 1$  as Directed.  
1041 In addition, the motion tracks showing a behavior similar to a levy-flight (presenting mixed  
1042 Confined and Directed/Brownian behavior) were detected by the presence of a jump superior to  
1043 the average jump among the track + a jump threshold of 1.5, and classified as “Butterfly.” Butterfly  
1044 motion tracks were segmented into their corresponding Confined and Directed/Brownian sub-  
1045 trajectories for posterior analysis. As an additional filtering step of confined motions (including  
1046 confined segments of Butterfly tracks), we defined a jump threshold of 100nm, to filter out motion  
1047 tracks with an average frame-to-frame jump size larger than 100nm.

### 1048 **Data mining of published datasets**

1049 DNA-binding peaks of C/EBP $\alpha$  and PU.1 during BMT were extracted from (Van Oevelen et al.  
1050 2015) and analysed as stated above. Single-cell expression trajectories and correlations in B cell  
1051 transdifferentiation and reprogramming were processed from (Francesconi et al., 2019). Gene  
1052 expression data from hematopoietic cells (CMP, GMP, Monocyte and Granulocyte (neutrophil))  
1053 were from (Ohlsson et al., 2016).

## 1054 **Statistical analyses**

1055 Statistical analyses were performed using Prism 9 software. To calculate significance, samples  
1056 from at least 3 biologically independent experiments were analyzed. Two biological replicates  
1057 were used for RNA- and ATAC- sequencing experiments and statistics applied to the expression  
1058 of a collection of genes. For samples with  $n \geq 3$ , values shown in the figures represent mean  $\pm$   
1059 standard deviation. Box plots represent median with quartiles and whiskers and individual values  
1060 are shown. One-way, two-way ANOVA (with the corresponding multiple comparison analyses)  
1061 and Student's t-tests were applied accordingly. P-values appear indicated in each figure only  
1062 when  $\leq 0.05$ . In time-course experiments, p-values of differences between conditions by two-  
1063 way ANOVA are shown. In box plots, p-values of each individual timepoint as well as p-values  
1064 of differences between conditions by two-way ANOVA are shown.

1065

## 1066 **Table S1. List of antibodies used for cell sorting and Flow cytometry experiments**

| <b>FACS/Cell sorting</b> |                |                  |                |                 |
|--------------------------|----------------|------------------|----------------|-----------------|
| <b>Antibody</b>          | <b>Company</b> | <b>Catalogue</b> | <b>Species</b> | <b>Dilution</b> |
| Cd16/Cd32<br>(FcBlock)   | BD Pharmingen  | 553142           | Rat            | 1:400           |
| Cd19-Biotin              | BD Biosciences | 553784           | Rat            | 1:400           |
| Mac1-Biotin              | BD Pharmingen  | 557395           | Rat            | 1:400           |
| hCD4-Biotin              | eBioscience    | 13-0049          | Mouse          | 1:33            |
| Cd19-APC                 | BD Pharmingen  | 550992           | Rat            | 1:400           |
| Mac1-PE-Cy7              | BD Pharmingen  | 552850           | Rat            | 1:400           |
| Ly6g-PE                  | Pharmingen     | 553128           | Rat            | 1:400           |

|                          |               |            |       |       |
|--------------------------|---------------|------------|-------|-------|
| Mac1-APC                 | eBioscience   | 17-0112-83 | Rat   | 1:400 |
| hCD4-PE                  | BD Pharmingen | 555347     | Mouse | 1:20  |
| hCD16/CD32<br>(hFcBlock) | Invitrogen    | 16-9161-73 | -     | 1:20  |
| hCD19-APC-Cy7            | BD Pharmingen | 557791     | Mouse | 1:33  |
| hMac1-APC                | BD Pharmingen | 561015     | Mouse | 1:33  |
| Cd16/Cd32-FITC           | BD Pharmingen | 553144     | Rat   | 1:400 |
| cKit-APC-Cy7             | Invitrogen    | 47-1172-82 | Rat   | 1:400 |
| Cd34-APC                 | BD Pharmingen | 560230     | Rat   | 1:50  |
| Sca1-PE-Cy7              | BD Pharmingen | 558162     | Rat   | 1:400 |
| Sca1-PerCP-Cy5.5         | eBioscience   | 35-5981-82 | Rat   | 1:400 |
| Cd41-PE-Cy7              | eBioscience   | 25-0411-82 | Rat   | 1:400 |

1067

1068 **Table S2. List of antibodies and fluorochromes used for immunofluorescence and**  
 1069 **intracellular staining for flow cytometry**

| <b>Intracellular staining for flow cytometry</b> |                |                  |                |                 |
|--------------------------------------------------|----------------|------------------|----------------|-----------------|
| <b>Antibody</b>                                  | <b>Company</b> | <b>Catalogue</b> | <b>Species</b> | <b>Dilution</b> |
| C/EBP $\alpha$                                   | Cell Signaling | 8178             | Rabbit         | 1:100           |
| Carm1                                            | Cell Signaling | 12495            | Mouse          | 1:100           |
| PU.1                                             | Abcam          | Ab88082          | Mouse          | 1:100           |
| BAFF155                                          | Cell Signaling | D7F8S            | Rabbit         | 1:200           |
| BAFF155-<br>AsDM                                 | Cell Signaling | 94962            | Rabbit         | 1:200           |
| AF488 Anti-<br>rabbit                            | ThermoFisher   | A-11070          | Goat           | 1:500           |

|                  |              |         |      |       |
|------------------|--------------|---------|------|-------|
| AF555 Anti-mouse | ThermoFisher | A-21422 | Goat | 1:500 |
|------------------|--------------|---------|------|-------|

1070

1071 **Table S3. Chemical reagents used to prepare buffers for western blot.**

| Running buffer | Transfer buffer         | TBST              |
|----------------|-------------------------|-------------------|
| 25mM Tris-base | 25mM Tris-HCl<br>pH=3.8 | 10mM Tris HCl=7.5 |
| 200mM glycine  | 200mM glycine           | 100mM NaCl        |
| 0.1% SDS       | 20% methanol            | 0.1% Tween 20     |

1072 **Table S4. List of antibodies used for western blot experiments**

| Antibody       | Company        | Catalogue | Species | Dilution |
|----------------|----------------|-----------|---------|----------|
| C/EBP $\alpha$ | Cell Signaling | 8178      | Rabbit  | 1:1000   |
| aDMA           | Cell Signaling | 13522S    | Rabbit  | 1:1000   |
| aDMA           | Upstate        | #07-414   | Rabbit  | 1:1000   |
| HA             | Covance        | #MMS-101R | Mouse   | 1:1000   |
| Flag           | Sigma          | F3165     | Mouse   | 1:1000   |
| Flag           | Abnova         | PAB 29056 | Chicken | 1:1000   |
| BAFF155        | Cell Signaling | D7F8S     | Rabbit  | 1:1000   |
| BAFF155-AsDM   | Cell Signaling | 94962     | Rabbit  | 1:1000   |
| PU.1           | Abcam          | Ab88082   | Mouse   | 1:1000   |
| Vinculin       | Merck          | V9131     | Mouse   | 1:200    |

|       |       |         |       |        |
|-------|-------|---------|-------|--------|
| Gapdh | Abcam | Ab8245  | Mouse | 1:5000 |
| H3    | Abcam | Ab10799 | Mouse | 1:1000 |

1073

1074 **Table S5. List of peptides used for in vitro methylation experiments**

| Peptides                                                                         |
|----------------------------------------------------------------------------------|
| YEAEP <b>R</b> PPMSS, aa 7-17                                                    |
| AFGF <b>P</b> R <b>G</b> AGPA, aa 30-40                                          |
| LFQHS <b>R</b> QQEKA, aa 81-91                                                   |
| GYLDG <b>R</b> LEPLY, aa 137-147                                                 |
| EPLYE <b>R</b> VGAPA, aa 144-154                                                 |
| GAPAL <b>R</b> PLVIK, aa 151-161                                                 |
| IKQEP <b>R</b> EEDEA, aa 160-170                                                 |
| AHPDL <b>R</b> ASGGS, aa 259-269                                                 |
| SNEY <b>R</b> V <b>R</b> R <b>R</b> ERN <b>N</b> IA, aa 282-295                  |
| NIAV <b>R</b> K <b>S</b> R <b>D</b> KAK, aa 293-304                              |
| DKAKQ <b>R</b> NVETQ, aa 301-311                                                 |
| SDND <b>R</b> L <b>R</b> K <b>R</b> VEQL, aa 319-331                             |
| VEQLS <b>R</b> ELDTL, aa 328-338                                                 |
| ELDTL <b>R</b> G <b>I</b> F <b>R</b> QLPES, aa 334-348                           |
| MSSHLQSPPHAPSSAAFG <b>F</b> P <b>R</b> GAGP<br>AQPPAPPA <b>A</b> PEPLGG aa 15-54 |



|                                                                                          |
|------------------------------------------------------------------------------------------|
| MSSHLQSPPHAPSSAAF <del>G</del> F <del>P</del> R(me2)<br>GAGPAQPPAPPAAPEPLGG aa 15-<br>54 |
| MSSHLQSPPHAPSSAAF <del>G</del> F <del>P</del> R/AGA<br>GPAQPPAPPAAPEPLGG aa 15-54        |
| PRMT4 peptide substrate                                                                  |
| Histone H3 aa 1-21                                                                       |
| Histone H4 aa 1-21                                                                       |

1075

1076 **Table S6. List of genes used to analyze kinetics of specific signatures**

|                                                                                                                                                |
|------------------------------------------------------------------------------------------------------------------------------------------------|
| <b>B cell genes – Figure S1H</b>                                                                                                               |
| <i>Pax5, Ebf1, Foxo1, Ikzf1, Rag1, Rag2, Bcl11a, Spiib, Ikzf3, Cd2, Cd19, Igl1, Vpreb1, Vpreb2, Vpreb3, Pou2a1, Blk, Cd79a, Cd79b, Lef1</i>    |
| <b>Macrophage genes – Figure S1H</b>                                                                                                           |
| <i>C1qc, Fcer1g, Sell, Ccr1, Mitf, Tlr2, Csf1r, Trem2, Fam20c, Adam8, Batf2, Fes, Itgam, Ccl3, Cd300lf, Tnsf9, Tyrobp, Cd14, Ifitm6, Csf3r</i> |

1077 **Newly Created Materials**

1078 The new constructs and cell lines listed can be obtained by a request to the corresponding  
 1079 authors at [thomas.graf@crq.eu](mailto:thomas.graf@crq.eu); [aleutz@mdc-berlin.de](mailto:aleutz@mdc-berlin.de). The sequencing data will be deposited  
 1080 at GEO and made freely available.

1081 **Competing interests.**

1082 The authors declare no competing interests

1083 **REFERENCES**

- 1084 Arinobu Y, Mizuno S, Chong Y, Shigematsu H, Iino T, Iwasaki H, Graf T, Mayfield R, Chan S,  
1085 Kastner P, Akashi K. 2007. Reciprocal Activation of GATA-1 and PU.1 Marks Initial  
1086 Specification of Hematopoietic Stem Cells into Myeloerythroid and Myelolymphoid Lineages.  
1087 *Cell Stem Cell* **1**:416–427. doi:10.1016/j.stem.2007.07.004
- 1088 Bedford MT, Clarke SG. 2009. Protein Arginine Methylation in Mammals: Who, What, and Why.  
1089 *Mol Cell* **33**:1–13. doi:10.1016/j.molcel.2008.12.013
- 1090 Bedford MT, Richard S. 2005. Arginine methylation: An emerging regulator of protein function.  
1091 *Mol Cell* **18**:263–272. doi:10.1016/j.molcel.2005.04.003
- 1092 Buenrostro JD, Wu B, Chang HY, Greenleaf WJ. 2015. ATAC-seq: A method for assaying  
1093 chromatin accessibility genome-wide. *Curr Protoc Mol Biol* **2015**:21.29.1-21.29.9.  
1094 doi:10.1002/0471142727.mb2129s109
- 1095 Bussmann LH, Schubert A, Vu Manh TP, De Andres L, Desbordes SC, Parra M, Zimmermann  
1096 T, Rapino F, Rodriguez-Ubrea J, Ballestar E, Graf T. 2009. A Robust and Highly Efficient  
1097 Immune Cell Reprogramming System. *Cell Stem Cell* **5**:554–566.  
1098 doi:10.1016/j.stem.2009.10.004
- 1099 Cai D. H., Wang D, Keefer J, Yeaman C, Hensley K, Friedman AD. 2008. C/EBP $\alpha$ :AP-1 leucine  
1100 zipper heterodimers bind novel DNA elements, activate the PU.1 promoter and direct  
1101 monocyte lineage commitment more potently than C/EBP $\alpha$  homodimers or AP-1. *Oncogene*  
1102 **27**:2772–2779. doi:10.1038/SJ.ONC.1210940
- 1103 Chang NC, Sincennes MC, Chevalier FP, Brun CE, Lacaria M, Segalés J, Muñoz-Cánoves P,  
1104 Ming H, Rudnicki MA. 2018. The Dystrophin Glycoprotein Complex Regulates the  
1105 Epigenetic Activation of Muscle Stem Cell Commitment. *Cell Stem Cell* **22**:755-768.e6.  
1106 doi:10.1016/j.stem.2018.03.022
- 1107 Chen J, Zhang Z, Li L, Chen BC, Revyakin A, Hajj B, Legant W, Dahan M, Lionnet T, Betzig E,  
1108 Tjian R, Liu Z. 2014. Single-molecule dynamics of enhanceosome assembly in embryonic  
1109 stem cells. *Cell* **156**:1274–1285. doi:10.1016/j.cell.2014.01.062
- 1110 Choi J, Baldwin TM, Wong M, Bolden JE, Fairfax KA, Lucas EC, Cole R, Biben C, Morgan C,  
1111 Ramsay KA, Ng AP, Kauppi M, Corcoran LM, Shi W, Wilson N, Wilson MJ, Alexander WS,  
1112 Hilton DJ, De Graaf CA. 2019. Haemopedia RNA-seq: A database of gene expression during  
1113 haematopoiesis in mice and humans. *Nucleic Acids Res* **47**:D780–D785.  
1114 doi:10.1093/nar/gky1020
- 1115 Deribe YL, Pawson T, Dikic I. 2010. Post-translational modifications in signal integration. *Nat*  
1116 *Struct Mol Biol* **17**:666–672. doi:10.1038/nsmb.1842
- 1117 Di Stefano B, Sardina JL, Van Oevelen C, Collombet S, Kallin EM, Vicent GP, Lu J, Thieffry D,  
1118 Beato M, Graf T. 2014. C/EBP $\alpha$  poises B cells for rapid reprogramming into induced  
1119 pluripotent stem cells. *Nature* **506**:235–239. doi:10.1038/nature12885
- 1120 Dobin A, Davis CA, Schlesinger F, Drenkow J, Zaleski C, Jha S, Batut P, Chaisson M, Gingeras  
1121 TR. 2013. STAR: Ultrafast universal RNA-seq aligner. *Bioinformatics* **29**:15–21.  
1122 doi:10.1093/bioinformatics/bts635
- 1123 Ebisuya M, Briscoe J. 2018. What does time mean in development? *Development* **145**.  
1124 doi:10.1242/dev.164368

- 1125 Eyquem S, Chemin K, Fasseu M, Chopin M, Sigaux F, Cumano A, Bories JC. 2004. The  
1126 development of early and mature B cells is impaired in mice deficient for the Ets-1  
1127 transcription factor. *Eur J Immunol* **34**:3187–3196. doi:10.1002/EJL.200425352
- 1128 Feng R, Desbordes SC, Xie H, Tillo ES, Pixley F, Stanley ER, Graf T. 2008a. PU.1 and C/EBP $\alpha$ / $\beta$   
1129 convert fibroblasts into macrophage-like cells. *Proceedings of the National Academy of*  
1130 *Sciences* **105**:6057–6062. doi:10.1073/pnas.0711961105
- 1131 Feng R, Desbordes SC, Xie H, Tillo ES, Pixley F, Stanley ER, Graf T. 2008b. PU.1 and C/EBP $\alpha$ / $\beta$   
1132 convert fibroblasts into macrophage-like cells. *Proc Natl Acad Sci U S A* **105**:6057–6062.  
1133 doi:10.1073/pnas.0711961105
- 1134 Fernandez Garcia M, Moore CD, Schulz KN, Alberto O, Donague G, Harrison MM, Zhu H, Zaret  
1135 KS. 2019. Structural Features of Transcription Factors Associating with Nucleosome  
1136 Binding. *Mol Cell* **75**:921-932.e6. doi:10.1016/j.molcel.2019.06.009
- 1137 Francesconi M, di Stefano B, Berenguer C, Andrés-Aguayo L de, Plana-Carmona M, Mendez-  
1138 Lago M, Guillaumet-Adkins A, Rodriguez-Esteban G, Gut M, Gut IG, Heyn H, Lehner B, Graf  
1139 T. 2019. Single cell RNA-seq identifies the origins of heterogeneity in efficient cell  
1140 transdifferentiation and reprogramming. *Elife* **8**:1–22. doi:10.7554/eLife.41627
- 1141 Graf T, Enver T. 2009a. Forcing cells to change lineages. doi:10.1038/nature08533
- 1142 Graf T, Enver T. 2009b. Forcing cells to change lineages. *Nature* **462**:587–594.  
1143 doi:10.1038/nature08533
- 1144 Greenblatt SM, Man N, Hamard PJ, Asai T, Karl D, Martinez C, Bilbao D, Stathais V, McGrew-  
1145 Jermacowicz A, Duffort S, Tadi M, Blumenthal E, Newman S, Vu L, Xu Y, Liu F, Schurer  
1146 SC, McCabe MT, Kruger RG, Xu M, Yang FC, Tenen D, Watts J, Vega F, Nimer SD. 2018.  
1147 CARM1 Is Essential for Myeloid Leukemogenesis but Dispensable for Normal  
1148 Hematopoiesis. *Cancer Cell* **33**:1111-1127.e5. doi:10.1016/j.ccell.2018.05.007
- 1149 Guo Z, Zheng L, Xu H, Dai H, Zhou M, Pascua MR, Chen QM, Shen B. 2010. Methylation of  
1150 FEN1 suppresses nearby phosphorylation and facilitates PCNA binding. *Nat Chem Biol*  
1151 **6**:766–773. doi:10.1038/NCHEMBIO.422
- 1152 Heath V, Suh HC, Holman M, Renn K, Gooya JM, Parkin S, Klarmann KD, Ortiz M, Johnson P,  
1153 Keller J. 2004. C/EBP $\alpha$  deficiency results in hyperproliferation of hematopoietic progenitor  
1154 cells and disrupts macrophage development in vitro and in vivo. *Blood* **104**:1639–1647.  
1155 doi:10.1182/blood-2003-11-3963
- 1156 Heinz S, Benner C, Spann N, Bertolino E, Lin YC, Laslo P, Cheng JX, Murre C, Singh H, Glass  
1157 CK. 2010. Simple Combinations of Lineage-Determining Transcription Factors Prime cis-  
1158 Regulatory Elements Required for Macrophage and B Cell Identities. *Mol Cell* **38**:576–589.  
1159 doi:10.1016/j.molcel.2010.05.004
- 1160 Hertweck A, Mucha MV De, Barber PR, Dagil R, Porter H, Ramos A, Lord GM, Jenner RG. 2022.  
1161 The TH1 cell lineage-determining transcription factor T-bet suppresses TH2 gene  
1162 expression by redistributing GATA3 away from TH2 genes. *Nucleic Acids Res* **1**.  
1163 doi:https://doi.org/10.1093/nar/gkac258
- 1164 Hosokawa H, Ungerbäck J, Wang X, Matsumoto M, Nakayama KI, Cohen SM, Tanaka T,  
1165 Rothenberg E V. 2018. Transcription Factor PU.1 Represses and Activates Gene

- 1166 Expression in Early T Cells by Redirecting Partner Transcription Factor Binding. *Immunity*  
1167 **48**:1119-1134.e7. doi:10.1016/j.immuni.2018.04.024
- 1168 Hsiao K, Zegzouti H, Goueli SA. 2016. Methyltransferase-Glo: A universal, bioluminescent and  
1169 homogenous assay for monitoring all classes of methyltransferases. *Epigenomics* **8**:321–  
1170 339. doi:10.2217/EPI.15.113/ASSET/IMAGES/LARGE/FIGURE14.JPEG
- 1171 Hu C-J, Rao S, Ramirez-Bergeron DL, Garrett-Sinha LA, Gerondakis S, Clark MR, Simo MC.  
1172 2001. PU.1/Spi-B Regulation of c-rel Is Essential for Mature B Cell Survival. *Immunity*  
1173 **15**:545–555.
- 1174 Jack I, Seshadri R, Garson M, Michael P, Callen D, Zola H, Morley A. 1986. RCH-ACV: A  
1175 lymphoblastic leukemia cell line with chromosome translocation 1;19 and trisomy 8. *Cancer*  
1176 *Genet Cytogenet* **19**:261–269. doi:10.1016/0165-4608(86)90055-5
- 1177 Kawabe YI, Wang YX, McKinnell IW, Bedford MT, Rudnicki MA. 2012. CARM1 regulates Pax7  
1178 transcriptional activity through MLL1/2 recruitment during asymmetric satellite stem cell  
1179 divisions. *Cell Stem Cell* **11**:333–345. doi:10.1016/j.stem.2012.07.001
- 1180 Kim D, Lee J, Cheng D, Li J, Carter C, Richie E, Bedford MT. 2010. Enzymatic activity is required  
1181 for the in Vivo functions of CARM1. *Journal of Biological Chemistry* **285**:1147–1152.  
1182 doi:10.1074/jbc.M109.035865
- 1183 Klemm SL, Shipony Z, Greenleaf WJ. 2019. Chromatin accessibility and the regulatory  
1184 epigenome. *Nature Reviews* **20**:207–220. doi:10.1038/s41576-018-0089-8
- 1185 Konstantinides N, Holguera I, Rossi AM, Escobar A, Dudragne L, Chen Y-C, Tran TN, Martínez  
1186 Jaimes AM, Özel MN, Simon F, Shao Z, Tsankova NM, Fullard JF, Walldorf U, Roussos P,  
1187 Desplan C. 2022. A complete temporal transcription factor series in the fly visual system.  
1188 *Nature* **604**:316–322. doi:10.1038/s41586-022-04564-w
- 1189 Kowenz-Leutz E, Pless O, Dittmar G, Knoblich M, Leutz A. 2010. Crosstalk between C/EBPB  
1190 phosphorylation, arginine methylation, and SWI/SNF/Mediator implies an indexing  
1191 transcription factor code. *EMBO Journal* **29**:1105–1115. doi:10.1038/emboj.2010.3
- 1192 Kowenz-Leutz E, Twamley G, Ansieau S, Leutz A. 1994. Novel mechanism of C/EBP $\beta$  (NF-M)  
1193 transcriptional control: Activation through derepression. *Genes Dev* **8**:2781–2791.  
1194 doi:10.1101/gad.8.22.2781
- 1195 Kueh HY, Champhekar A, Nutt SL, Elowitz MB, Rothenberg E v. 2013. Positive Feedback  
1196 Between PU.1 and the Cell Cycle Controls Myeloid Differentiation. *Science (1979)* **341**:670–  
1197 673. doi:10.1126/science.1240831
- 1198 Laiosa C V., Stadtfeld M, Xie H, de Andres-Aguayo L, Graf T. 2006. Reprogramming of  
1199 Committed T Cell Progenitors to Macrophages and Dendritic Cells by C/EBP $\alpha$  and PU.1  
1200 Transcription Factors. *Immunity* **25**:731–744. doi:10.1016/j.immuni.2006.09.011
- 1201 Leddin M, Perrod C, Hoogenkamp M, Ghani S, Assi S, Heinz S, Wilson NK, Follows G, Schönheit  
1202 J, Vockentanz L, Mosammam AM, Chen W, Tenen DG, Westhead DR, Göttgens B, Bonifer  
1203 C, Rosenbauer F. 2011. Two distinct auto-regulatory loops operate at the PU.1 locus in B  
1204 cells and myeloid cells. *Blood* **117**:2827–2838. doi:10.1182/blood-2010-08-302976

- 1205 Lerner J, Gomez-Garcia PA, McCarthy RL, Liu Z, Lakadamyali M, Zaret KS. 2020. Two-  
1206 Parameter Mobility Assessments Discriminate Diverse Regulatory Factor Behaviors in  
1207 Chromatin. *Mol Cell* **79**:677–688. doi:10.1016/j.molcel.2020.05.036
- 1208 Li H, Handsaker B, Wysoker A, Fennell T, Ruan J, Homer N, Marth G, Abecasis G, Durbin R.  
1209 2009. The Sequence Alignment/Map format and SAMtools. *Bioinformatics* **25**:2078–2079.  
1210 doi:10.1093/bioinformatics/btp352
- 1211 Li J, Zhao Z, Carter C, Ehrlich LIR, Bedford MT, Richie ER. 2013. Coactivator-Associated  
1212 Arginine Methyltransferase 1 Regulates Fetal Hematopoiesis and Thymocyte Development.  
1213 *The Journal of Immunology* **190**:597–604. doi:10.4049/jimmunol.1102513
- 1214 Liu Z, Tjian R. 2018. Visualizing transcription factor dynamics. *Journal of Cell Biology* **217**:1181–  
1215 1191. doi:10.1083/jcb.201710038
- 1216 Love MI, Huber W, Anders S. 2014. Moderated estimation of fold change and dispersion for  
1217 RNA-seq data with DESeq2. *Genome Biol* **15**:1–21. doi:10.1186/s13059-014-0550-8
- 1218 Ma O, Hong S, Guo H, Ghiaur G, Friedman AD. 2014. Granulopoiesis Requires Increased  
1219 C/EBP $\alpha$  Compared to Monopoiesis, Correlated with Elevated Cebpa in Immature G-CSF  
1220 Receptor versus M-CSF Receptor Expressing Cells. *PLoS One* **9**:e95784.  
1221 doi:10.1371/journal.pone.0095784
- 1222 Martin M. 2011. Cutadapt removes adapter sequences from high-throughput sequencing reads.  
1223 *EMBnet J* **17**.
- 1224 Moris N, Pina C, Arias AM. 2016. Transition states and cell fate decisions in epigenetic  
1225 landscapes. *Nat Rev Genet* **17**:693–703. doi:10.1038/nrg.2016.98
- 1226 Nakayama K, Szewczyk MM, dela Sena C, Wu H, Dong A, Zeng H, Li F, Ferreira De Freitas R,  
1227 Eram MS, Schapira M, Baba Y, Kunitomo M, Cary DR, Tawada M, Ohashi A, Imaeda Y,  
1228 Singh Saikatendu K, Grimshaw CE, Vedadi M, Arrowsmith CH, Barsyte-Lovejoy D, Kiba A,  
1229 Tomita D, Brown PJ. 2018. TP-064, a potent and selective small molecule inhibitor of  
1230 PRMT4 for multiple myeloma. *Oncotarget* **9**:18480–18493.
- 1231 Nerlov C. 2007. The C/EBP family of transcription factors: a paradigm for interaction between  
1232 gene expression and proliferation control. *Trends Cell Biol* **17**:318–324.  
1233 doi:10.1016/j.tcb.2007.07.004
- 1234 Notta F, Zandi S, Takayama N, Dobson S, Gan OI, Wilson G, Kaufmann KB, McLeod J, Laurenti  
1235 E, Dunant CF, McPherson JD, Stein LD, Dror Y, Dick JE. 2016. Distinct routes of lineage  
1236 development reshape the human blood hierarchy across ontogeny. *Science (1979)* **351**.  
1237 doi:10.1126/science.aab2116
- 1238 Ohlsson E, Schuster MB, Hasemann M, Porse BT. 2016. The multifaceted functions of C/EBP $\alpha$   
1239 in normal and malignant haematopoiesis. *Leukemia*. doi:10.1038/leu.2015.324
- 1240 Okawa S, Saltó C, Ravichandran S, Yang S, Toledo EM, Arenas E, Del Sol A. 2018.  
1241 Transcriptional synergy as an emergent property defining cell subpopulation identity enables  
1242 population shift. *Nat Commun* **9**:1–10. doi:10.1038/s41467-018-05016-8
- 1243 Orkin SH, Zon LI. 2008. Hematopoiesis: An Evolving Paradigm for Stem Cell Biology. *Cell*  
1244 **132**:631–644. doi:10.1016/j.cell.2008.01.025

- 1245 Ramberger E, Sapozhnikova V, Kowenz-Leutz E, Zimmermann K, Nicot N, Nazarov P v., Perez-  
1246 Hernandez D, Reimer U, Mertins P, Dittmar G, Leutz A. 2021. PRISMA and BioID disclose  
1247 a motifs-based interactome of the intrinsically disordered transcription factor C/EBP $\alpha$ .  
1248 *iScience* **24**:102686. doi:10.1016/j.isci.2021.102686
- 1249 Ramírez F, DüNDAR F, Diehl S, Grüning BA, Manke T. 2014. DeepTools: A flexible platform for  
1250 exploring deep-sequencing data. *Nucleic Acids Res* **42**:187–191. doi:10.1093/nar/gku365
- 1251 Rapino F, Robles EF, Richter-Larrea JA, Kallin EM, Martinez-Climent JA, Graf T. 2013a. C/EBP $\alpha$   
1252 Induces Highly Efficient Macrophage Transdifferentiation of B Lymphoma and Leukemia  
1253 Cell Lines and Impairs Their Tumorigenicity. *Cell Rep* **3**:1153–1163.  
1254 doi:10.1016/j.celrep.2013.03.003
- 1255 Rapino F, Robles EF, Richter-Larrea JA, Kallin EM, Martinez-Climent JA, Graf T. 2013b. C/EBP $\alpha$   
1256 Induces Highly Efficient Macrophage Transdifferentiation of B Lymphoma and Leukemia  
1257 Cell Lines and Impairs Their Tumorigenicity. *Cell Rep* **3**:1153–1163.  
1258 doi:10.1016/j.celrep.2013.03.003
- 1259 Raschke WC, Baird S, Ralph P, Nakoinz I. 1978. Functional macrophage cell lines transformed  
1260 by abelson leukemia virus. *Cell* **15**:261–267. doi:10.1016/0092-8674(78)90101-0
- 1261 Raudvere U, Kolberg L, Kuzmin I, Arak T, Adler P, Peterson H, Vilo J. 2019. G:Profiler: A web  
1262 server for functional enrichment analysis and conversions of gene lists (2019 update).  
1263 *Nucleic Acids Res* **47**:W191–W198. doi:10.1093/nar/gkz369
- 1264 Rayon T, Stamataki D, Perez-Carrasco R, Garcia-Perez L, Barrington C, Melchionda M, Exelby  
1265 K, Lazaro J, Tybulewicz VLJ, Fisher EMC, Briscoe J. 2020. Species-specific pace of  
1266 development is associated with differences in protein stability. *Science (1979)* **369**.  
1267 doi:10.1126/science.aba7667
- 1268 Schreiber E, Matthias P, Müller MM, Schaffner W. 1989. Rapid detection of octamer binding  
1269 proteins with ‘mini extracts’, prepared from a small number of cells. *Nucleic Acids Res*  
1270 **17**:6419. doi:10.1093/nar/17.15.6419
- 1271 Scott EW, Simon MC, Anastasi J, Singh H. 1994. Requirement of transcription factor PU.1 in the  
1272 development of multiple hematopoietic lineages. *Science (1979)* **265**:1573–1577.  
1273 doi:10.1126/science.8079170
- 1274 Sergé A, Bertaux N, Rigneault H, Marguet D. 2008. Dynamic multiple-target tracing to probe  
1275 spatiotemporal cartography of cell membranes. *Nature Methods* **5**:687–694.  
1276 doi:10.1038/nmeth.1233
- 1277 Singh H, Dekoter RP, Walsh JC. 1999. PU.1, a Shared Transcriptional Regulator of Lymphoid  
1278 and Myeloid Cell Fates. *Cold Spring Harb Symp Quant Biol* **64**:13–20.  
1279 doi:10.1101/sqb.1999.64.13
- 1280 Springer T, Galfré G, Secher DS, Milstein C. 1979. Mac-1: a macrophage differentiation antigen  
1281 identified by monoclonal antibody. *Eur J Immunol* **9**:301–306. doi:10.1002/eji.1830090410
- 1282 Stoilova B, Kowenz-Leutz E, Scheller M, Leutz A. 2013. Lymphoid to Myeloid Cell Trans-  
1283 Differentiation Is Determined by C/EBP $\beta$  Structure and Post-Translational Modifications.  
1284 *PLoS One* **8**:e65169. doi:10.1371/journal.pone.0065169

- 1285 Suresh S, Huard S, Dubois T. 2021. CARM1/PRMT4: Making Its Mark beyond Its Function as a  
1286 Transcriptional Coactivator. *Trends Cell Biol* **31**:402–417. doi:10.1016/j.tcb.2020.12.010
- 1287 Teves SS, An L, Hansen AS, Xie L, Darzacq X, Tjian R. 2016. A dynamic mode of mitotic  
1288 bookmarking by transcription factors. *Elife* **5**. doi:10.7554/ELIFE.22280
- 1289 Torcal Garcia G, Graf T. 2021a. The transcription factor code: a beacon for histone  
1290 methyltransferase docking. *Trends Cell Biol* **31**:792–800. doi:10.1016/j.tcb.2021.04.001
- 1291 Torcal Garcia G, Graf T. 2021b. The transcription factor code: a beacon for histone  
1292 methyltransferase docking. *Trends Cell Biol* **31**:792–800. doi:10.1016/j.tcb.2021.04.001
- 1293 Torres-Padilla ME, Parfitt DE, Kouzarides T, Zernicka-Goetz M. 2007. Histone arginine  
1294 methylation regulates pluripotency in the early mouse embryo. *Nature* **445**:214–218.  
1295 doi:10.1038/nature05458
- 1296 Torres-Padilla M-E, Parfitt D-E, Kouzarides T, Zernicka-Goetz M. 2007. Histone arginine  
1297 methylation regulates pluripotency in the early mouse embryo. *Nature* **445**:214–218.  
1298 doi:10.1038/nature05458
- 1299 van Oevelen C, Collombet S, Vicent G, Hoogenkamp M, Lepoivre C, Badeaux A, Bussmann L,  
1300 Sardina JL, Thieffry D, Beato M, Shi Y, Bonifer C, Graf T. 2015. C/EBP $\alpha$  Activates Pre-  
1301 existing and de Novo Macrophage Enhancers during Induced Pre-B Cell Transdifferentiation  
1302 and Myelopoiesis. *Stem Cell Reports* **5**:232–247. doi:10.1016/j.stemcr.2015.06.007
- 1303 van Oevelen C, Collombet S, Vicent G, Hoogenkamp M, Lepoivre C, Badeaux A, Bussmann L,  
1304 Sardina JL, Thieffry D, Beato M, Shi Y, Bonifer C, Graf T. 2015. C/EBP $\alpha$  Activates Pre-  
1305 existing and De Novo Macrophage Enhancers during Induced Pre-B Cell  
1306 Transdifferentiation and Myelopoiesis. *Stem Cell Reports* **5**:232–247.  
1307 doi:10.1016/j.stemcr.2015.06.007
- 1308 Van Oevelen C, Collombet S, Vicent G, Hoogenkamp M, Lepoivre C, Badeaux A, Bussmann L,  
1309 Sardina JL, Thieffry D, Beato M, Shi Y, Bonifer C, Graf T. 2015. C/EBP $\alpha$  Activates Pre-  
1310 existing and de Novo Macrophage Enhancers during Induced Pre-B Cell Transdifferentiation  
1311 and Myelopoiesis. *Stem Cell Reports* **5**:232–247. doi:10.1016/j.stemcr.2015.06.007
- 1312 Velten L, Haas SF, Raffel S, Blaszkiewicz S, Hennig BP, Hirche C, Lutz C, Buss EC, Boch T,  
1313 Hofmann W, Ho AD, Huber W. 2017. Human haematopoietic stem cell lineage commitment  
1314 is a continuous process **19**:271–281. doi:10.1038/ncb3493.Human
- 1315 Wang K, Wei G, Liu D. 2012. CD19: a biomarker for B cell development, lymphoma diagnosis  
1316 and therapy. *Exp Hematol Oncol* **1**:36. doi:10.1186/2162-3619-1-36
- 1317 Wang L, Zhao Z, Meyer MB, Saha S, Yu M, Guo A, Wisinski KB, Huang W, Cai W, Pike JW,  
1318 Yuan M, Ahlquist P, Xu W. 2014. CARM1 methylates chromatin remodeling factor BAF155  
1319 to enhance tumor progression and metastasis. *Cancer Cell* **25**:21–36.  
1320 doi:10.1016/j.ccr.2013.12.007
- 1321 Wu Q, Schapira M, Arrowsmith CH, Barsyte-Lovejoy D. 2021. Protein arginine methylation: from  
1322 enigmatic functions to therapeutic targeting. *Nat Rev Drug Discov* **20**:509–530.  
1323 doi:10.1038/s41573-021-00159-8
- 1324 Xie H, Ye M, Feng R, Graf T. 2004a. Stepwise reprogramming of B cells into macrophages. *Cell*  
1325 **117**:663–676. doi:10.1016/S0092-8674(04)00419-2

- 1326 Xie H, Ye M, Feng R, Graf T. 2004b. Stepwise Reprogramming of B Cells into Macrophages.  
1327 *Cell* **117**:663–676. doi:10.1016/S0092-8674(04)00419-2
- 1328 Xue HH, Bollenbacher-Reilley J, Wu Z, Spolski R, Jing X, Zhang YC, McCoy JP, Leonard WJ.  
1329 2007. The Transcription Factor GABP Is a Critical Regulator of B Lymphocyte Development.  
1330 *Immunity* **26**:421–431. doi:10.1016/J.IMMUNI.2007.03.010
- 1331 Yadav N, Cheng D, Richard S, Morel M, Iyer VR, Aldaz CM, Bedford MT. 2008. CARM1  
1332 promotes adipocyte differentiation by coactivating PPAR $\gamma$ . *EMBO Rep* **9**:193–198.  
1333 doi:10.1038/sj.embor.7401151
- 1334 Zhang P, Iwasaki-Arai J, Iwasaki H, Fenyus ML, Dayaram T, Owens BM, Shigematsu H,  
1335 Levantini E, Huettner CS, Lekstrom-Himes JA, Akashi K, Tenen DG. 2004. Enhancement  
1336 of hematopoietic stem cell repopulating capacity and self-renewal in the absence of the  
1337 transcription factor C/EBP $\alpha$ . *Immunity* **21**:853–863. doi:10.1016/j.immuni.2004.11.006
- 1338 Zhang XK, Moussa O, LaRue A, Bradshaw S, Molano I, Spyropoulos DD, Gilkeson GS, Watson  
1339 DK. 2008a. The Transcription Factor Fli-1 Modulates Marginal Zone and Follicular B Cell  
1340 Development in Mice. *The Journal of Immunology* **181**:1644–1654.  
1341 doi:10.4049/JIMMUNOL.181.3.1644
- 1342 Zhang XK, Moussa O, LaRue A, Bradshaw S, Molano I, Spyropoulos DD, Gilkeson GS, Watson  
1343 DK. 2008b. The Transcription Factor Fli-1 Modulates Marginal Zone and Follicular B Cell  
1344 Development in Mice. *The Journal of Immunology* **181**:1644–1654.  
1345 doi:10.4049/jimmunol.181.3.1644
- 1346
